# 1 ErbB4 deletion in noradrenergic neurons in the locus 2 coeruleus induces mania-like behavior via elevated 3 catecholamines

4 Shu-Xia Cao<sup>1†</sup>, Ying Zhang<sup>2†</sup>, Xing-Yue Hu<sup>1</sup>, Bin Hong<sup>1</sup>, Peng Sun<sup>2</sup>, Hai-Yang He<sup>2</sup>, Hong-Yan Geng<sup>2</sup>, Ai-Min  
5 Bao<sup>2</sup>, Shu-Min Duan<sup>2</sup>, Jian-Ming Yang<sup>3</sup>, Tian-Ming Gao<sup>3</sup>, Hong Lian<sup>2,\*</sup>, Xiao-Ming Li<sup>1,2,\*</sup>

6 <sup>1</sup>Affiliated Sir Run Run Shaw Hospital, Zhejiang University School of Medicine, Hangzhou, China; <sup>2</sup>Department of  
7 Neurobiology, Institute of Neuroscience, Key Laboratory of Medical Neurobiology of the Ministry of Health, Joint  
8 Institute for Genetics and Genome Medicine between Zhejiang University and University of Toronto, Collaborative  
9 Innovation Center for Brain Science, Zhejiang University School of Medicine, Hangzhou, China; <sup>3</sup>Department of  
10 Neurobiology, School of Basic Medical Sciences, Southern Medical University, Guangzhou, China

11 \*For Correspondence: lixm@zju.edu.cn (X-ML); honglian@zju.edu.cn (HL)

12 †These authors contributed equally to this work.

13 **Competing interests:** The authors declare that no competing interests exist.

14 Funding: See page 15

15 **Impact statement:** This study for the first time elaborate the important role of ErbB4 in noradrenergic neurons associated with mania  
16 pathogenesis.

---

18 **Abstract** Dysfunction of the noradrenergic (NE) neurons is implicated in the pathogenesis of manic-depressive  
19 psychosis (MDP). ErbB4 is highly expressed in NE neurons, and its genetic variation has been linked to MDP; however,  
20 how ErbB4 regulates NE neuronal function and contributes to MDP pathogenesis is unclear. Here we find that  
21 conditional deletion of ErbB4 in locus coeruleus (LC) NE neurons increases neuronal spontaneous firing through NMDA  
22 receptor hyperfunction, and elevates catecholamines in the cerebrospinal fluid (CSF). Furthermore, ErbB4-deficient mice  
23 present mania-like behaviors, including hyperactivity, reduced anxiety and depression, and increased sucrose preference.  
24 These behaviors are completely rescued by the anti-manic drug lithium or antagonists of catecholaminergic receptors.  
25 Our study demonstrates the critical role of ErbB4 signaling in regulating LC-NE neuronal function, reinforcing the view  
26 that dysfunction of the NE system may contribute to the pathogenesis of mania-associated disorder.

---

27

## 28 Introduction

29 Manic-depressive psychosis (MDP), diagnosed on the basis of manic episodes with or without depression, is a severely  
30 debilitating psychiatric disorder (Holden, 2008). Though risk genes and rodent models of MDP have been reported (Arey  
31 et al., 2013; Craddock and Sklar, 2009; Gouvea et al., 2016; Han et al., 2013; Roybal et al., 2007; Saul et al., 2012), the  
32 underlying pathogenic mechanism has not yet been clearly defined due to the phenotypic and genotypic complexity of  
33 this disorder (Harrison et al., 2017).

34 Several lines of evidence implicate the noradrenergic (NE) system in the pathology of MDP. For instance, the  
35 concentrations of norepinephrine and its metabolites are significantly upregulated in the cerebrospinal fluid (CSF) of  
36 MDP patients during the manic state (Kurita, 2016; Manji et al., 2003; Post et al., 1973; Post et al., 1978). In contrast,  
37 norepinephrine is downregulated in patients with depressive disorder (Maas et al., 1971; Moret and Briley, 2011; Wiste  
38 et al., 2008) and associated with mood transition in MDP patients (Kurita, 2016; Salvatore et al., 2010). However, how  
39 the NE system is involved in the pathology of MDP remains uncertain.

40 ErbB4, a receptor tyrosine kinase, plays a vital role in a number of biological processes, including neural  
41 development, excitability, and synaptic plasticity (Mei and Nave, 2014). In parvalbumin-positive (PV) interneurons,  
42 ErbB4 is involved in the etiology of schizophrenia and epilepsy (Chen et al., 2010; Del Pino et al., 2013; Fisahn et al.,  
43 2009; Li et al., 2012; Tan et al., 2012). ErbB4 mRNA is also prominently expressed in locus coeruleus (LC) NE neurons  
44 (Gerecke, 2001), and coding variants of *ERBB4* are genetically associated with MDP susceptibility (Chen et al., 2012;  
45 Goes et al., 2011). However, how ErbB4 regulates NE neuronal function and whether NE neuron-specific ErbB4  
46 signaling participates in the pathogenesis of MDP is unknown.

47 In this study, we achieved ErbB4 deletion primarily in NE neurons by crossing *TH-Cre* mice (Gelman et al., 2003), in  
48 which Cre recombinase is mainly expressed in NE neurons of the LC (see Figure 1A-E and Discussion section), with  
49 mice carrying the loxP-flanked *ErbB4* allele (*ErbB4<sup>loxP/loxP</sup>*). ErbB4 deletion increases the spontaneous firing of LC-NE  
50 neurons in an NMDA receptor-dependent manner, and elevates the concentrations of norepinephrine and dopamine in the  
51 CSF. Furthermore, *TH-Cre;ErbB4<sup>loxP/loxP</sup>* mice manifest a mania-like behavioral profile that can be recapitulated by  
52 *ErbB4<sup>loxP/loxP</sup>* mice with region-specific ablation of ErbB4 in the LC. In addition, treatment with lithium, a commonly  
53 used clinical anti-manic drug, or antagonists against dopamine or norepinephrine receptors all rescue the mania-like  
54 behaviors in *TH-Cre;ErbB4<sup>loxP/loxP</sup>* mice. Taken together, our study linked ErbB4 physiological function with NE system  
55 homeostasis and demonstrated the pathogenic effect of ErbB4 dysregulation in NE neurons in mania-associated  
56 psychiatric diseases.

## 57 Results

### 58 **ErbB4 is primarily deleted from LC-NE neurons in *TH-Cre;ErbB4<sup>loxP/loxP</sup>* mice**

59 To determine Cre distribution in our specific *TH-Cre* mouse line, we crossed *TH-Cre* mice with Ai9 mice to label Cre-  
60 positive neurons with red fluorescent protein tdTomato (Madisen et al., 2010). We examined Cre expression in the LC,  
61 ventral tegmental nucleus (VTA), and substantia nigra pars compacta (SNc) of Ai9;*TH-Cre* mice at postnatal day (P) 50  
62 because tyrosine hydroxylase (TH), the key enzyme for the synthesis of norepinephrine and dopamine, is mainly  
63 expressed in these three areas. Colocalization analysis of TH staining and tdTomato suggested that in the rostral part of  
64 the LC, approximately 40% of TH-positive (TH+) neurons were Cre/Tomato-positive (Cre/Tomato+) and 92% of  
65 Cre/Tomato+ neurons were TH+, whereas in the caudal part of the LC, Cre/Tomato+ neurons only constituted 14% of  
66 TH+ neurons, with 82% of Cre/Tomato+ neurons being TH+ (Figure 1A, B). The VTA and SNc contain approximately  
67 70% of the dopaminergic neurons in the brain (Bjorklund and Dunnett, 2007). Unexpectedly, in contrast to the LC, there  
68 were very few Cre/Tomato+ neurons in the VTA and SNc. Cre/Tomato was only expressed in approximately 1.6% and  
69 0.9% of neurons in the rostral and caudal VTA, respectively. Moreover, only 2.1% of neurons in the rostral and caudal  
70 parts of the SNc were Cre/Tomato+. In the rostral and caudal parts of the VTA and SNc, only 8% and 12% of  
71 Cre/Tomato+ neurons, respectively, were TH+ (Figure 1A, B). To exclude possible false-positive signals introduced by  
72 the reporter mouse line, we took advantage of Ai3 mice, another reporter mouse strain that labels Cre-positive neurons  
73 with green fluorescent protein (GFP), to confirm these results. Consistently, we observed very little Cre expression in the  
74 VTA or SNc (Figure 1-figure supplement 1). These data suggest that Cre recombinase was primarily expressed in the  
75 NE neurons of the LC in our *TH-Cre* mouse line.

76 To investigate its role in NE neurons, we deleted ErbB4 in NE neurons by crossing *TH-Cre* with *ErbB4<sup>loxP/loxP</sup>* mice  
77 (Figure 1C). Immunoblotting analysis showed that ErbB4 was significantly decreased in the LC of *TH-Cre;ErbB4<sup>loxP/loxP</sup>*  
78 mice (Figures 1D, E, and Figure 1-figure supplement 2) with no significant change in the midbrain (VTA and SNc)  
79 (Figure 1D, E), which is consistent with our previous observation that Cre was mainly expressed in LC-NE neurons in  
80 *TH-Cre* mice. Immunohistochemical analysis also confirmed the deletion of ErbB4 in the LC (Figure 1F). In addition, we  
81 observed no obvious changes in cell density or soma size of LC neurons in *TH-Cre;ErbB4<sup>loxP/loxP</sup>* mice compared to  
82 control mice (Figures 1F and Figure 1-figure supplement 3).

### 83 **Hyperactive LC-NE neurons in *TH-Cre;ErbB4<sup>loxP/loxP</sup>* mice increase extracellular** 84 **norepinephrine and dopamine**

85 To analyze the influence of ErbB4 deficiency on LC-NE neuronal physiology, we measured the spontaneous activity of  
86 LC-NE neurons in *TH-Cre;ErbB4<sup>loxp/loxp</sup>* mice in cell-attached configuration. Consistent with previous studies, LC-NE  
87 neurons recorded from slices of the control mice exhibited a firing rate of  $2 \pm 0.26$  Hz (Chandler et al., 2014; Jedema and  
88 Grace, 2004) (Figure 2A, C). However, the spontaneous firing rate of LC-NE neurons in the *TH-Cre;ErbB4<sup>loxp/loxp</sup>* mice  
89 was significantly increased ( $3.04 \pm 0.29$  Hz) (Figure 2B, C), and the interspike interval was significantly decreased  
90 (Figure 2D).

91 Previous studies have demonstrated that neuronal excitability can affect the expression and phosphorylation of TH,  
92 the rate limiting factor in catecholamine synthesis (Aumann et al., 2011; Chevalier et al., 2008; Lew et al., 1999;  
93 Zigmond et al., 1989). Using protein extracts of LC tissues from controls and mutants, we measured the expression of  
94 phosphorylated TH (TH-Ser40), an active form of TH required for norepinephrine synthesis, along with other enzymes  
95 involved in norepinephrine homeostasis, including dopamine beta-hydroxylase (DBH), norepinephrine transporter  
96 (NET), and catechol-O-methyltransferase (COMT). We observed a marked increase in TH-Ser40 but not in total TH  
97 (Figures 2E, F, and Figure 2-figure supplement 1). In contrast, DBH, another enzyme involved in norepinephrine  
98 synthesis, and NET and COMT, which regulate norepinephrine degradation, were unchanged (Figure 2E, F). Thus,  
99 changes in the neuronal excitability of LC-NE neurons in *TH-Cre;ErbB4<sup>loxp/loxp</sup>* mice may specifically increase TH  
100 phosphorylation. Using lysates from the midbrain, none of these proteins showed any changes (Figure 2G, H), suggesting  
101 region-specific norepinephrine synthetic activity influenced in mutant animals.

102 As LC-NE neurons are the major source of norepinephrine in the forebrain (Sara, 2009), we hypothesized that the  
103 increase in NE neuronal and TH activities in the LC might increase the level of norepinephrine in the brain. Therefore,  
104 we examined the norepinephrine level in *TH-Cre;ErbB4<sup>loxp/loxp</sup>* mice using *in vivo* microdialysis in the lateral ventricle of  
105 anaesthetized mice, followed by high-performance liquid chromatography (HPLC). Results showed that norepinephrine  
106 concentration was significantly increased in the CSF of *TH-Cre;ErbB4<sup>loxp/loxp</sup>* mice (Figures 2I and Figure 2-figure  
107 supplement 2). Given that dopamine, the precursor of norepinephrine, is coupled with changes in norepinephrine level  
108 and can be co-released with norepinephrine by NE neurons (Devoto et al., 2005; Guiard et al., 2008; Pozzi et al., 1994;  
109 Yamamoto and Novotney, 1998), we also examined the concentration of dopamine in the CSF in *TH-Cre;ErbB4<sup>loxp/loxp</sup>*  
110 mice. Remarkably, the concentration of dopamine was also obviously increased compared with that in the control mice  
111 (Figures 2J and Figure 2-figure supplement 2).

112 Taken together, the increased excitability of LC-NE neurons may increase TH phosphorylation, resulting in the  
113 increase of norepinephrine and dopamine observed in the CSF of *TH-Cre;ErbB4<sup>loxp/loxp</sup>* mice.

## 114 **Increased spontaneous firing of LC-NE neurons in *TH-Cre;ErbB4<sup>loxP/loxP</sup>* mice due to NMDA** 115 **receptor hyperfunction**

116 An increase in glutamatergic synaptic input (Jodo and Aston-Jones, 1997; Somogyi and Llewellyn-Smith, 2001), or  
117 decrease in feedback inhibition from  $\alpha$ -2-adrenoceptor, an autoreceptor (Langer, 1980; Starke, 2001), may contribute to  
118 the increased firing rate of LC-NE neurons. Moreover, in studies on the hippocampus and prefrontal cortex, the NMDA  
119 receptor, especially its subunit isoform NR2B, is reported to be regulated by ErbB4 (Hahn et al., 2006; Pitcher et al.,  
120 2011). Therefore, we examined the expression of NR2B and autoreceptors  $\alpha$ -2A (A2A) and  $\alpha$ -2C (A2C) using protein  
121 samples from the LC. Results showed that the expression of NR2B was significantly increased in *TH-Cre;ErbB4<sup>loxP/loxP</sup>*  
122 mice, whereas no changes were detected in the expressions of NR1, A2A, or A2C (Figure 3A, B).

123 We hypothesized that the increase in NE neuronal activity might be attributed to strengthened NMDA receptor  
124 function correlated with NR2B overexpression in *TH-Cre;ErbB4<sup>loxP/loxP</sup>* mice. Using the patch clamp technique, we found  
125 that the spontaneous firing rates and interspike intervals of LC-NE neurons in *TH-Cre;ErbB4<sup>loxP/loxP</sup>* mice were rescued by  
126 the NMDA receptor antagonist APV (50  $\mu$ M) (Figure 3C, D, and E). Thus, NMDA receptors appear to mediate the  
127 hyperexcitability of LC-NE neurons in *TH-Cre;ErbB4<sup>loxP/loxP</sup>* mice.

## 128 ***TH-Cre;ErbB4<sup>loxP/loxP</sup>* mice show mania-like behaviors**

129 The LC is involved in mood, reward, and motor ability (Borodovitsyna et al., 2017; Dickinson et al., 1988; Neophytou et  
130 al., 2001). As ErbB4 was mainly deleted from the LC-NE neurons in *TH-Cre;ErbB4<sup>loxP/loxP</sup>* mice, we hypothesized that  
131 *TH-Cre;ErbB4<sup>loxP/loxP</sup>* mice might exhibit LC-related behavioral abnormalities. We first examined the motor ability of  
132 *TH-Cre;ErbB4<sup>loxP/loxP</sup>* mice using the open field test. *TH-Cre;ErbB4<sup>loxP/loxP</sup>* mice traveled longer distances and at higher  
133 speeds than control mice (Figure 4A-E) and spent less time immobile (Figure 4F). To examine anxiety- and depression-  
134 related behaviors of *TH-Cre;ErbB4<sup>loxP/loxP</sup>* mice, we conducted the elevated plus maze test (EPM) and forced swim test.  
135 In the EPM, *TH-Cre;ErbB4<sup>loxP/loxP</sup>* mice spent more time in and presented more entries into the open arms compared with  
136 the control mice (Figure 4G-I). In the forced swim test, *TH-Cre;ErbB4<sup>loxP/loxP</sup>* mice showed less immobility (Figure 4J)  
137 and longer latency to first surrender compared with the control mice (Figure 4K). To examine the responses of *TH-*  
138 *Cre;ErbB4<sup>loxP/loxP</sup>* mice to a natural reward, we performed the sucrose preference test. During this test, *TH-*  
139 *Cre;ErbB4<sup>loxP/loxP</sup>* mice displayed increased preference for sucrose compared with the control mice (Figure 4L). No  
140 significant deficits in body weight or prepulse inhibition were observed in *TH-Cre;ErbB4<sup>loxP/loxP</sup>* mice (Figure 4-figure  
141 supplement 1). These data indicate that *TH-Cre;ErbB4<sup>loxP/loxP</sup>* mice exhibited hyperactivity, decreased anxiety and  
142 depression, and increased sucrose preference, thus resembling the phenotypes of rodent mania models (Arey et al., 2013;

143 Cosgrove et al., 2015; Han et al., 2013; Kirshenbaum et al., 2011; Nestler and Hyman, 2010; Prickaerts et al., 2006;  
144 Roybal et al., 2007; Shaltiel et al., 2008).

### 145 **Region-specific deletion of ErbB4 in the LC causes mania-like behaviors**

146 To exclude the possibility that the *TH-Cre;ErbB4<sup>loxP/loxP</sup>* mouse phenotypes were attributed to Cre-expressing neurons in  
147 other brain areas, we tested whether region-specific deletion of ErbB4 in the LC was sufficient to induce mania-like  
148 behaviors. We injected an adeno-associated virus (AAV) expressing Cre and GFP (AAV-Cre-GFP) into the LC of  
149 *ErbB4<sup>loxP/loxP</sup>* mice bilaterally. Cre/GFP was expressed abundantly in the LC (Figure 5A), with 52% of LC neurons being  
150 Cre/GFP-positive (Cre/GFP+) and 77.7% of Cre/GFP+ neurons being TH+ (Figure 5-figure supplement 1).  
151 Immunoblotting confirmed the efficiency of the ErbB4 deletion, showing significantly decreased ErbB4 in the LC of  
152 *ErbB4<sup>loxP/loxP</sup>* mice after AAV-Cre-GFP injection (Figure 5B). Behavioral tests were carried out 4 weeks after viral  
153 injection. In the open field test, viral-mediated region-specific deletion of ErbB4 in the LC significantly increased  
154 locomotor activity and traveling speed (Figure 5C, D), and both the distance and time traveled at high speed were  
155 significantly increased (Figure 5E, F). Moreover, the immobility time in the open area was significantly reduced (Figure  
156 5G). In the EPM, ErbB4 deletion in the LC significantly increased both the time in and number of entries into the open  
157 arms (Figure 5H, I). In the forced swim test, mice with LC ErbB4 deletion exhibited decreased immobility time and  
158 increased latency to first surrender (Figure 5J, K). In the sucrose preference test, LC ErbB4 deletion significantly  
159 increased sucrose preference of the injected mice (Figure 5L). These results indicate that region-specific deletion of  
160 ErbB4 in the LC was sufficient to induce similar mania-like behaviors as those manifested in *TH-Cre;ErbB4<sup>loxP/loxP</sup>* mice.

### 161 **Lithium treatment in *TH-Cre;ErbB4<sup>loxP/loxP</sup>* mice rescues behavioral, molecular, and** 162 **electrophysiological abnormalities**

163 Lithium was the first medicine approved by the Food and Drug Administration for MDP treatment. Testing the effect of  
164 lithium treatment on the behavioral abnormalities of *TH-Cre;ErbB4<sup>loxP/loxP</sup>* mice may validate those behaviors to be  
165 mania-like and also reveal whether NE neurons are involved in the mechanism of lithium.

166 After mice were treated for 10 d with lithium chloride (600 mg L<sup>-1</sup>) dissolved in drinking water, as described  
167 previously (Roybal et al., 2007), the behavioral performance of *TH-Cre;ErbB4<sup>loxP/loxP</sup>* mice was rescued in the open field  
168 test, EPM, forced swim test, and sucrose preference test (Figure 6). In the open field test, lithium decreased locomotor  
169 activity, traveling speed, and distance and time traveled at high speed, and increased immobility time of *TH-*  
170 *Cre;ErbB4<sup>loxP/loxP</sup>* mice (Figure 6A-E). In addition, lithium decreased both time in and entries into the open arms by *TH-*  
171 *Cre;ErbB4<sup>loxP/loxP</sup>* mice in the EPM (Figure 6F-G). The treated *TH-Cre;ErbB4<sup>loxP/loxP</sup>* mice also exhibited significantly

172 increased immobility time and decreased latency to first surrender in the forced swim test (Figure 6H, I), and reduced  
173 sucrose preference in the sucrose preference test (Figure 6J).

174 To better understand the mechanisms underlying the effect of lithium on mania-like behaviors of *TH-*  
175 *Cre;ErbB4<sup>loxp/loxp</sup>* mice, Western blotting and patch clamp recordings were performed to detect TH phosphorylation and  
176 spontaneous firing of LC-NE neurons after lithium treatment, respectively. The phosphorylation of TH was significantly  
177 decreased in *TH-Cre;ErbB4<sup>loxp/loxp</sup>* mice receiving lithium (Figure 6K, L), whereas no change was observed in the protein  
178 levels of TH or the membrane-bound and soluble forms of COMT (MB-COMT and S-COMT, respectively) (Figure 6K,  
179 L). In addition, the spontaneous firing rates and interspike intervals of LC-NE neurons in *TH-Cre;ErbB4<sup>loxp/loxp</sup>* mice were  
180 both rescued after lithium treatment (Figure 6M, N).

181 These results indicate that NE neurons may be a potential target of lithium in the treatment of mania. In addition, the  
182 rescuing effect of lithium on the behavioral abnormalities of *TH-Cre;ErbB4<sup>loxp/loxp</sup>* mice further indicated that the  
183 behaviors induced by ErbB4 deletion in LC-NE neurons are mostly mania-like phenotypes.

#### 184 **Increase in norepinephrine and dopamine contributes to mania-like behaviors in *TH-*** 185 ***Cre;ErbB4<sup>loxp/loxp</sup>* mice**

186 Our previous results showed that both norepinephrine and dopamine were increased in *TH-Cre;ErbB4<sup>loxp/loxp</sup>* mice (Figure  
187 2I, J). To identify which system contributes to the mania-like behaviors of *TH-Cre;ErbB4<sup>loxp/loxp</sup>* mice, norepinephrine  $\alpha$ 1  
188 receptor antagonist prazosin (1 mg/kg, i.p.) and dopamine D1 receptor antagonist SCH23390 (0.125 mg/kg, i.p.) were  
189 used to inhibit the effects of norepinephrine and dopamine, respectively. Both prazosin and SCH23390 decreased the  
190 locomotor activity and traveling speed of *TH-Cre;ErbB4<sup>loxp/loxp</sup>* mice in the open field test (Figure 7A, B). Furthermore,  
191 both distance and time traveled at high speed decreased (Figure 7C, D), and the immobility time was markedly increased  
192 (Figure 7E) after prazosin and SCH23390 treatment. In the EPM test, prazosin and SCH23390 treatment in *TH-*  
193 *Cre;ErbB4<sup>loxp/loxp</sup>* mice decreased the time spent in the open arms, although no effect on the number of entries was  
194 observed (Figure 7F, G). Moreover, *TH-Cre;ErbB4<sup>loxp/loxp</sup>* mice treated with prazosin or SCH23390 exhibited increased  
195 immobility time and decreased latency to first surrender in the forced swim test (Figure 7H, I). In the sucrose preference  
196 test, prazosin and SCH23390 both significantly decreased the sucrose preference of *TH-Cre;ErbB4<sup>loxp/loxp</sup>* mice (Figure  
197 7J). Taken together, these results demonstrate that increases in norepinephrine and dopamine contribute to the mania-like  
198 behaviors of *TH-Cre;ErbB4<sup>loxp/loxp</sup>* mice.

#### 199 Discussion

200 We show that disruption of ErbB4 in LC-NE neurons causes NMDA receptor-mediated hyperactive spontaneous firing  
201 of LC-NE neurons and elevates CSF norepinephrine and dopamine concentrations, which induce mania-like behaviors  
202 that could be rescued by lithium or noradrenergic and dopaminergic receptor antagonists. This is the first study to  
203 demonstrate the function of ErbB4 in the regulation of behavior and mood by LC-NE neurons and of catecholamine  
204 dyshomeostasis in the pathogenesis of mania-associated disorders such as MDP.

205 MDP is a severe psychiatric disorder with a long-term global disease burden; however, its pathogenic mechanisms  
206 remain unknown (Harrison et al., 2017). Despite the increase of norepinephrine in MDP patient brains in mania episodes  
207 observed since early in the twentieth century (Manji et al., 2003; Post et al., 1973; Post et al., 1978), a clear description of  
208 a causal role played by norepinephrine in the pathophysiology of MDP is lacking. Here, for the first time, we  
209 demonstrates direct causality between catecholamine dyshomeostasis and mania behavior, as well as the important role  
210 of ErbB4 in MDP pathogenesis. Conditional ErbB4 deletion in LC-NE neurons increased the concentration of both  
211 norepinephrine and dopamine in the CSF, which is consistent with clinical observations of MDP patients. By specifically  
212 blocking the function of norepinephrine or dopamine, we restored the mania-like behaviors of *TH-Cre;ErbB4<sup>loxp/loxp</sup>* mice,  
213 providing strong evidence that elevated norepinephrine directly contributes to MDP pathogenesis. These findings will  
214 facilitate a better understanding of the pathophysiology of diseases associated with mania beyond MDP. The increased  
215 dopamine level may be attributable to the co-release of dopamine in NE neurons and the regulation of dopamine by NE  
216 neuronal terminals (Carboni et al., 1990; Devoto et al., 2005; Pozzi et al., 1994; Yamamoto and Novotney, 1998).

217 The mechanism underlying lithium treatment for MDP is complicated and unresolved (Jope, 1999; Schloesser et al.,  
218 2012). Here we showed that lithium rescued the abnormal spontaneous firing activity and TH phosphorylation of LC-NE  
219 neurons and alleviated mania-like behaviors in *TH-Cre;ErbB4<sup>loxp/loxp</sup>* mice (Figure 6). These observations suggest that  
220 LC-NE neurons may be a target of lithium and thus provide a possible mechanism for lithium treatment of MDP. In  
221 contrast to the manifestation in mutant mice, lithium treatment led to increased movement and decreased immobile time  
222 in the forced swim test in control mice (Figure 6), suggesting different functions of lithium in physiological and  
223 pathological statuses.

224 The LC is a nucleus consisting of most of the NE neurons in the brain, and its impairment has been implicated in  
225 many severe neurodegenerative diseases and affective disorders (Benarroch, 2009; Berridge and Waterhouse, 2003; Gary  
226 Aston-Jones 2005; Mather and Harley, 2016; Pamphlett, 2014; Ross et al., 2015). Though norepinephrine has been  
227 linked with MDP, direct evidence of how the LC functions in the pathogenesis of MDP is still unclear (Bernard et al.,  
228 2011; Biela et al., 2012; Kato, 2008). Here, we provide direct evidence demonstrating the crucial role of the LC in MDP  
229 pathogenesis.



230 *ErbB4* is a genetic susceptibility gene for schizophrenia (Mei and Xiong, 2008; Pitcher et al., 2011), with many  
231 studies reporting the crucial role of ErbB4 in the pathogenesis of schizophrenia (Chong et al., 2008; Del Pino et al., 2013;  
232 Hahn et al., 2006; Shamir et al., 2012). While coding variants of *ErbB4* have also been genetically associated with MDP  
233 (Chen et al., 2012; Goes et al., 2011), direct evidence remains limited. We reveal that functional deficiency of ErbB4 in  
234 LC-NE neurons facilitates the paroxysm of mania-like behaviors and increases spontaneous firing of LC-NE neurons  
235 (Figure 2A-D). In contrast, conditional ErbB4 deletion in parvalbumin-positive GABAergic neurons in the frontal cortex  
236 decreases the excitability of these neurons via KV<sub>1.1</sub> (Li et al., 2012). These lines of evidence suggest that ErbB4 may  
237 function differently in different neurons.

238 The NMDA receptor, especially its subunit isoform NR2B, is regulated by ErbB4 in the hippocampus and prefrontal  
239 cortex (Bjarnadottir et al., 2007; Pitcher et al., 2011). Consistent with previous studies on the influence of ErbB4 on  
240 NR2B, we observed NR2B overexpression in LC tissue of ErbB4-deficient mice (Figure 3A-B). However, how ErbB4  
241 deletion increases NR2B protein expression and how NR2B overexpression participates in the strengthening of NMDA  
242 receptor function in the hyperexcitability of ErbB4-deficient NE neurons requires further investigation.

243 Past studies have reported ErbB4 mRNA to be highly expressed in the LC area (Gerecke, 2001). We confirmed  
244 ErbB4 protein expression in LC-NE neurons (Figure 1F). In addition, we functionally validated the presence of ErbB4 in  
245 LC-NE neurons by showing increased spontaneous firing and TH phosphorylation upon ErbB4 deletion. However, a  
246 previous report failed to detect the expression of Cre/Tomato in LC neurons in *ErbB4::CreERT2;Rosa::LSL-tdTomato*  
247 mice (Bean et al., 2014). This discrepancy may arise from the different experimental methods adopted by the different  
248 research groups.

249 Earlier research has shown that Cre is abundantly expressed in *TH-Cre* mouse lines in the NE and dopaminergic  
250 neurons of the LC and midbrain, respectively (Lindeberg et al., 2004; Savitt et al., 2005). Recent research used the *TH-*  
251 *Cre* line (Gong et al., 2007) to drive ErbB4 selective deletion, with gene loss mainly observed in dopaminergic neurons  
252 in the midbrain (Gong et al., 2007; Skirzewski et al., 2017). In contrast, very low Cre expression was detected in the  
253 midbrain dopaminergic neurons in our *TH-Cre* mice (Gelman et al., 2003) compared with the abundant Cre expression  
254 observed in the LC-NE neurons. Though mice of the same genotype (both *TH-Cre;ErbB4<sup>loxp/loxp</sup>*) were used, the varied  
255 Cre expression in the distinct *TH-Cre* lines in our research and that of Skirzewski et al. (2017) yielded different findings  
256 on ErbB4 function in different neuronal types. ErbB4 deletion in dopaminergic neurons in the midbrain led to deficits in  
257 spatial/working memory but had no influence on locomotion or anxiety (Skirzewski et al., 2017). In comparison, our  
258 mutant mice with ErbB4 deletion in LC-NE neurons presented significant hyperactivity and reduced anxiety (Figure 4).  
259 The reason underlying the discrepancy between different *TH-Cre* lines is currently unknown (Lammel et al., 2015). One

260 probable explanation may be that *Cre* is inserted into different chromosomal loci and the surrounding genetic or  
261 epigenetic elements may modify the spatial and temporal regulation of *Cre* gene expression.

262 Together, our findings demonstrate the importance of ErbB4 in LC-NE neurons in behavior and mood regulation and  
263 reveal the participation of catecholamine homeostasis modulated by ErbB4 in the pathogenesis of mania-associated  
264 disorders. Future studies aimed at identifying ErbB4 downstream signals in LC-NE neurons may provide new insights  
265 into therapies for mania-associated disorders.

266

## 267 Materials and methods

### 268 **Generation and maintenance of mice**

269 Two mouse lines were used. We first crossed *TH-Cre* mice (kindly provided by Yuqiang Ding, Tongji University School  
270 of Medicine, Shanghai, China), which have been described previously (Gelman et al., 2003), with *ErbB4<sup>loxP/loxP</sup>* mice  
271 (Mutant Mouse Regional Resource Center from North America), generating a *TH-Cre;ErbB4<sup>loxP/loxP</sup>* mouse line in which  
272 ErbB4 was mainly deleted in the noradrenergic neurons (NE neurons). For electrophysiological recordings, we then  
273 crossed *TH-Cre;ErbB4<sup>loxP/loxP</sup>* mice with Ai9 mice, which are used as a Cre reporter strain (purchased from Jackson  
274 Laboratory). Only male mice (8–12 weeks old) with normal appearance and weight were used in experiments and were  
275 divided into different groups randomly. All mice were housed under a 12-h light/dark cycle and had access to food and  
276 water *ad libitum*.

### 277 **Immunohistochemical analysis**

278 Mice were anesthetized with 10% chloral hydrate and perfused with ice-cold saline followed by paraformaldehyde (PFA)  
279 (4%) in phosphate-buffered saline (PBS). Brains were removed and fixed in the same 4% PFA solution at 4°C overnight  
280 and transferred to 30% sucrose in PBS for 2 d. Frozen brains were sectioned at 30 µm with a sliding microtome (Leica  
281 CM3050 S, Leica biosystems) in the coronal plane. Slices were immersed in PBS with 0.02% sodium azide and stored at  
282 4°C until further use. After incubation in blocking buffer containing 5% goat serum and 3% bovine serum albumin  
283 (BSA) in PBST (0.5% Triton X-100 in PBS) for 1 h at room temperature, slices were incubated with primary antibodies  
284 (rabbit tyrosine hydroxylase (TH)-specific antibody (1:700, Abcam), mouse ErbB4-specific antibody (1:300, Abcam)) in  
285 blocking buffer at 4°C overnight. The slices were washed three times in PBST and incubated with Alexa Fluor 488- or  
286 Alexa Fluor 543-conjugated secondary antibodies at 25°C for 1 h. All slices were counterstained with DAPI during final  
287 incubation. Fluorescent image acquisition was performed with an Olympus FluoView FV1000 confocal microscope  
288 using a 20× objective lens and analyzed using ImageJ software.

### 289 **Western blot analysis.**

290 Brain tissues were homogenized in RIPA lysis buffer containing 50 mM Tris (pH 7.4), 150 mM NaCl, 1% Triton X-100,  
291 1% sodium deoxycholate, 0.1% SDS, 1 mM PMSF, and phosphatase inhibitor cocktail (Cell Signaling Technology).  
292 Protein samples were loaded on 10% acrylamide SDS-PAGE gels and then transferred to nitrocellulose membranes.  
293 After incubation with 4% BSA for 1 h at 25°C, membranes were incubated with primary antibodies at 4°C overnight

294 (sheep TH-specific antibody, 1:2,000, Millipore; rabbit TH-Ser40-specific antibody, 1:1,000, Millipore; rabbit ErbB4-  
295 specific antibody, 1:2,000, Abcam; rabbit norepinephrine transporter (NET)-specific antibody, 1:300, Millipore; rabbit  
296 dopamine beta-hydroxylase (DBH)-specific antibody, 1:300, Abcam; rabbit GAPDH-specific antibody, 1:5,000, Cell  
297 Signaling Technology; mouse catechol-o-methyltransferase (COMT)-specific antibody, 1:5,000, BD Biosciences; and  
298 rabbit actin-specific antibody, 1:2,000, Cell Signaling Technology). The membranes were washed three times and then  
299 incubated for 1 h with horseradish peroxidase-conjugated secondary antibodies in 4% BSA at 25°C. Immunoreactive  
300 bands were visualized clearly by X-ray film exposure (ECL kit, Thermo Scientific) and analyzed using NIH ImageJ  
301 software. Each experiment was repeated at least three times.

### 302 **Surgery and microdialysis**

303 Mice were deeply anesthetized with isoflurane (0.15% in oxygen gas) and mounted on a stereotaxic frame (RWD Life  
304 Science). A stainless steel guide cannula with a dummy probe was implanted into the lateral ventricle (anteroposterior  
305 (AP) = -0.6 mm; mediolateral (ML) = ±1.2 mm; dorsoventral (DV) = -2.0 mm). After 7 d of recovery, the dummy probe  
306 was replaced with a microdialysis probe (membrane length: 4 mm, molecular weight cut-off: 18,000 Da, outer diameter:  
307 0.2 mm). For balance, artificial cerebrospinal fluid (ACSF), which contained (in mM) 125 NaCl, 2.5 KCl, 2 CaCl<sub>2</sub>, 1  
308 MgCl<sub>2</sub>, 1.25 NaH<sub>2</sub>PO<sub>4</sub>, 25 NaHCO<sub>3</sub>, and 11 D-glucose, was perfused continuously by syringe pump at a speed of 2 μl  
309 min<sup>-1</sup> for 2 h before sample collection. Samples (60 μl each) were automatically collected from each mouse for 2 h and  
310 analyzed by high-performance liquid chromatography (HPLC) with an electrochemical detector (5014b, ESA, USA). The  
311 concentrations of norepinephrine and dopamine were detected by HPLC (Coulochem III, ESA, USA) using a C18  
312 column (MD150 3 mm × 150 mm, 5 μm, ESA, USA).

### 313 **Slice preparation**

314 Mice were deeply anesthetized and decapitated. The brain was quickly removed and immersed in ice-cold high-sucrose  
315 ACSF bubbled with 95% O<sub>2</sub>/5% CO<sub>2</sub> to maintain a pH of 7.4. High-sucrose ACSF contained the following (in mM): 200  
316 sucrose, 3 KCl, 2 CaCl<sub>2</sub>, 2 MgCl<sub>2</sub>, 1.25 NaH<sub>2</sub>PO<sub>4</sub>, 26 NaHCO<sub>3</sub>, and 10 D-glucose. Coronal slices (250 μm) were  
317 prepared with a vibratome (Leica, VT 1000S, Germany), allowed to rest for 1 h at 34°C in oxygenated ACSF, and then  
318 maintained at 25°C before transfer to the recording chamber.

### 319 **Electrophysiology**

320 Acute slices from adult mice were transferred to a recording chamber and fully submerged in ACSF at 25°C, which was  
321 continuously perfused (2 ml/min) with oxygen. Fluorescent neurons were visually identified under an upright microscope

322 (Nikon, Eclipse FN1) equipped with an infrared-sensitive CCD camera with a  $\times 40$  water-immersion lens (Nikon,  
323 ECLIPSE FN1), and extracellular recordings were performed in cell-attached mode (MultiClamp 700B Amplifier,  
324 Digidata 1440A analog-to-digital converter). Microelectrodes (3–5 M $\Omega$ ) were filled with a solution containing 130 mM  
325 potassium gluconate, 20 mM KCl, 10 mM HEPES buffer, 2 mM MgCl $\cdot$ 6 H $_2$ O, 4 mM Mg-ATP, 0.3 mM Na-GTP, and 10  
326 mM EGTA; the pH was adjusted to 7.25 with 10 M KOH. Following a 3-min stabilization period, spontaneous firing was  
327 recorded for at least 4 min for each neuron. All analyses were performed using Clampfit 10.2 (Axon  
328 Instruments/Molecular Devices).

### 329 **Virus vectors and stereotactic injection**

330 AAV-GFP and AAV-hSyn-Cre-GFP were purchased from Shanghai SBO Medical Biotechnology Company, Shanghai.  
331 For viral injection, 1-month-old *ErbB4*<sup>loxP/loxP</sup> mice were anesthetized with chloral hydrate (400 mg/kg of body weight) by  
332 intraperitoneal (i.p.) injection and placed in a stereotactic frame, with their skulls then exposed by scalpel incision. Glass  
333 microelectrodes were used to bilaterally inject 0.15  $\mu$ l of purified and concentrated AAV ( $\sim 10^{11}$  infections units per ml)  
334 into the locus coeruleus (LC) (coordinates from bregma: anterior-posterior, 5.25 mm; lateral-medial, 1.00 mm; dorsal-  
335 ventral,  $-4.5$  mm) at 100 nl min $^{-1}$ . The injection microelectrode was slowly withdrawn 2 min after virus infusion.

### 336 **Behavioral assays**

337 All experiments were performed between 13:00 and 16:00. The behaviors of *TH-Cre* mice resembled those of  
338 *ErbB4*<sup>loxP/loxP</sup> mice (data not shown), and both lines were used as controls. All experiments were performed in a double-  
339 blind fashion.

#### 340 **Open field test**

341 Open field tests were performed in an open field chamber (50 cm  $\times$  50 cm) equipped with infrared sensors (CCTV lens)  
342 in a room with dim light. Mice could freely explore the novel environment for 10 min, and their movements were traced  
343 and analyzed simultaneously using viewpoint application manager software (VideoTrack 3.10). Total distance, speed,  
344 and immobility time were analyzed. The open field chamber was cleaned with 70% ethanol and wiped with paper towels  
345 between tests.

#### 346 **Elevated plus maze test**

347 Elevated plus maze (EPM) tests were performed in a dimly lit room. The maze was elevated 70 cm above the floor and  
348 consisted of two closed arms (5  $\times$  30 cm) surrounded by 15-cm-high plastic walls and two open arms (5  $\times$  30 cm). For

349 testing, a mouse was placed in the center (5 × 5 cm) of the maze and allowed to explore for 5 min. Mouse movements  
350 were recorded and analyzed using Mobile Datum recording and analysis software. The amount of time spent in and  
351 number of entries into the open arms and closed arms were measured. The maze was cleaned with 70% ethanol and  
352 wiped with paper towels after each test.

### 353 Forced swim test

354 Forced swim tests were performed in a room with normal light. Mice were placed in a transparent plastic cylinder  
355 (diameter: 12 cm; height: 30 cm) containing 20–24°C water at 15-cm depth. During the 6-min test period, the mice were  
356 monitored using a video camera (Mobile Datum) from the side. Total time spent, immobility time, and latency to first  
357 immobility were analyzed by an observer off-line, who was blinded to the experimental treatments. After the 6-min test  
358 period, the cylinders were cleaned with 70% ethanol and wiped with paper towels. The water in the cylinder was changed  
359 for each new mouse.

### 360 Sucrose preference test

361 Mice were single-housed for 1 week with a normal drinking water bottle. The bottle was then replaced with two identical  
362 bottles (bottle “A” and bottle “B”) filled with drinking water for 2 d (W/W). The positions of bottle A and bottle B were  
363 switched daily to avoid place preference. Bottle A and bottle B were then filled with drinking water alone and drinking  
364 water with 2% sucrose, respectively, for 2 d (W/S) and switched after 24 h. The consumption of the solutions in bottle A  
365 and bottle B were measured by weighing, and the preference for sucrose was calculated as the ratio of consumption of  
366 the sucrose solution to that of both the water and sucrose solutions during the 2 d of testing.

### 367 Prepulse inhibition

368 During the PPI test, mice were subjected to 20 startle trials (120 dB, 20 ms), 10 pre-pulse/startle trials (pre-pulse  
369 duration, 20 ms; intensities, 75, 80, and 85 dB; interstimulus intervals, 100 ms; and 20 ms 120 dB startle stimulus), 15  
370 pre-pulse trials (5 for 75, 80, and 85 dB each), and five background noise trials (65 dB), for a total of 70 trials. Different  
371 trial types were presented pseudorandomly. No two consecutive trials were identical except for five consecutive startle  
372 trials at the beginning and end of each session, which were not used for PPI analysis. Mouse movement was measured  
373 during 65 ms after startle stimulus onset (sampling frequency 1 kHz). PPI (%) was calculated according to the formula:  
374  $(100 - (\text{startle amplitude on pre-pulse-startle trials} / \text{startle amplitude on startle pulse alone trials}) \times 100)$ .

### 375 Drug treatment

376 Mice were treated for 10 d with lithium chloride (600 mg L<sup>-1</sup>) in drinking water and were then subjected to behavioral  
377 tests or sacrificed for Western blotting or patch clamp experiments (Dehpour et al., 2002; Roybal et al., 2007). Prazosin  
378 and SCH23390 were injected (i.p.) 30 min before the experiment.

### 379 **Quantification and statistical analysis**

380 The samples were randomly assigned to each group and restricted randomization was applied. The investigator was  
381 blinded to group allocation and when assessing outcome in the all behavioral tests and immunocytochemistry tests. For  
382 the electrophysiology experiments, the investigator was blinded when assessing outcome. For quantification, values from  
383 three independent experiments with at least three biological replicates were used. For behavioral assays, all population  
384 values appeared normally distributed, and variance was similar between groups. Sample size was calculated according to  
385 the preliminary experimental results and the formula:  $N = [(Z_{\alpha/2} + Z_{\beta})\sigma / \delta]^2(Q1^{-1} + Q2^{-1})$ , where  $\alpha = 0.05$  significance  
386 level,  $\beta = 0.2$ , power = 1- $\beta$ ,  $\delta$  is the difference between means of two samples, and Q is the sample fraction. All data are  
387 presented as means  $\pm$  s.e.m. and were analyzed using Two-tailed Student's t-test, one-way analysis of variance  
388 (ANOVA), two-way ANOVA, or two-way repeated-measures ANOVA. The Kolmogorov–Smirnov test (K–S test) was  
389 used to compare the interspike interval distributions, as specified in each figure legend and Supplementary Tables 1–4.  
390 Grubbs' test are used to detect an outlier. All data were analyzed using Origin8.0 (OriginLab) and Clampfit 10.2  
391 (AxonInstruments). Data were exported into Illustrator CS5 (Adobe Systems) for preparation of figures.

## 392 Acknowledgements

393 We thank Nick Spitzer (University of California at San Diego) for manuscript suggestions. We are grateful to Y.Q. Ding  
394 (Tongji University) and X.Q. Chen (Institute of Neuroscience, Zhejiang University) for providing mouse lines or  
395 experimental facilities. We express our thanks to L. Wang (Zhejiang University) for technical assistance.

## 396 Additional information

### 397 Funding

| Funder                                                     | Grant reference | Author       |
|------------------------------------------------------------|-----------------|--------------|
| National Key R & D Program of China                        | 2016YFA0501003  | Xiao-Ming Li |
| National Natural Science Foundation of<br>China            | 91432306        | Xiao-Ming Li |
| National Natural Science Foundation of<br>China            | 31430034        | Xiao-Ming Li |
| National Natural Science Foundation of<br>China            | 81221003        | Xiao-Ming Li |
| National Natural Science Foundation of<br>China            | 31700904        | Shu-Xia Cao  |
| Zhejiang Provincial Natural Science<br>Foundation of China | LY17C090004     | Hong Lian    |

**The funders had no role in study design, data collection and interpretation, or decision to submit this work for publication.**

### 398 Author contributions

399 S-XC conducted the experiments, collected and analyzed the data, and wrote the manuscript; YZ conducted the  
400 experiments and collected the data; S-XC, PS, H-YH, and BH contributed to *in vivo* microdialysis; H-YG conducted part  
401 of the behavioral experiments; X-YH, A-MB, S-MD, J-MY, and T-MG contributed experimental and manuscript  
402 suggestions; HL conducted experiments, supervised the project, and wrote the manuscript; X-ML supervised the project  
403 and wrote the manuscript.

### 404 Ethics

405 Animal experimentation: The care and use of the mice were reviewed and approved by the Animal Advisory Committee  
406 at Zhejiang University. Every effort was made to minimize suffering.

407



## 408 References

- 409 Arey RN, Enwright JF, Spencer SM, Falcon E, Ozburn AR, Ghose S, Tamminga C, and McClung CA. 2013. An important  
410 role for Cholecystokinin, a CLOCK target gene, in the development and treatment of manic-like behaviors. *Molecular*  
411 *Psychiatry*. doi: 10.1038/mp.2013.12.
- 412 Aumann TD, Egan K, Lim J, Boon WC, Bye CR, Chua HK, Baban N, Parish CL, Bobrovskaya L, Dickson P, and Horne MK.  
413 2011. Neuronal activity regulates expression of tyrosine hydroxylase in adult mouse substantia nigra pars compacta  
414 neurons. *J Neurochem* 116: 646-658. doi: 10.1111/j.1471-4159.2010.07151.x.
- 415 Bean JC, Lin TW, Sathyamurthy A, Liu F, Yin DM, Xiong WC, and Mei L. 2014. Genetic labeling reveals novel cellular  
416 targets of schizophrenia susceptibility gene: distribution of GABA and non-GABA ErbB4-positive cells in adult mouse  
417 brain. *J Neurosci* 34: 13549-13566. doi: 10.1523/JNEUROSCI.2021-14.2014.
- 418 Benarroch EE. 2009. The locus ceruleus norepinephrine system: functional organization and potential clinical  
419 significance. *Neurology* 73: 1699-1704. doi: 10.1212/WNL.0b013e3181c2937c.
- 420 Bernard R, Kerman IA, Thompson RC, Jones EG, Bunney WE, Barchas JD, Schatzberg AF, Myers RM, Akil H, and Watson  
421 SJ. 2011. Altered expression of glutamate signaling, growth factor, and glia genes in the locus coeruleus of patients with  
422 major depression. *Mol Psychiatry* 16: 634-646. doi: 10.1038/mp.2010.44.
- 423 Berridge CW, and Waterhouse BD. 2003. The locus coeruleus–noradrenergic system: modulation of behavioral state  
424 and state-dependent cognitive processes. *Brain Research Reviews* 42: 33-84. doi: 10.1016/s0165-0173(03)00143-7.
- 425 Biela H, Brisch R, Bernard-Mittelstaedt J, Dobrowolny H, Gos T, Baumann B, Mawrin C, Bernstein HG, Bogerts B, and  
426 Steiner J. 2012. Immunohistochemical evidence for impaired nitric oxide signaling of the locus coeruleus in bipolar  
427 disorder. *Brain Res* 1459: 91-99. doi: 10.1016/j.brainres.2012.04.022.
- 428 Bjarnadottir M, Misner DL, Haverfield-Gross S, Bruun S, Helgason VG, Stefansson H, Sigmundsson A, Firth DR, Nielsen B,  
429 Stefansdottir R, et al. 2007. Neuregulin1 (NRG1) signaling through Fyn modulates NMDA receptor phosphorylation:  
430 differential synaptic function in NRG1+/- knock-outs compared with wild-type mice. *J Neurosci* 27: 4519-4529. doi:  
431 10.1523/jneurosci.4314-06.2007.
- 432 Bjorklund A, and Dunnett SB. 2007. Dopamine neuron systems in the brain: an update. *Trends Neurosci* 30: 194-202.  
433 doi: 10.1016/j.tins.2007.03.006.
- 434 Borodovitsyna O, Flamini M, and Chandler D. 2017. Noradrenergic modulation of cognition in health and disease.  
435 *Neural Plast* 2017: 6031478. doi: 10.1155/2017/6031478.
- 436 Carboni E, Tanda GL, Frau R, and Di Chiara G. 1990. Blockade of the noradrenaline carrier increases extracellular  
437 dopamine concentrations in the prefrontal cortex: evidence that dopamine is taken up in vivo by noradrenergic  
438 terminals. *J Neurochem* 55: 1067-1070. doi: 10.1111/j.1471-4159.1990.tb04599.x.
- 439 Chandler DJ, Gao WJ, and Waterhouse BD. 2014. Heterogeneous organization of the locus coeruleus projections to  
440 prefrontal and motor cortices. *Proc Natl Acad Sci U S A* 111: 6816-6821. doi: 10.1073/pnas.1320827111.
- 441 Chen P, Chen J, Huang K, Ji W, Wang T, Li T, Wang Y, Wang H, He L, Feng G, and Shi Y. 2012. Analysis of association  
442 between common SNPs in ErbB4 and bipolar affective disorder, major depressive disorder and schizophrenia in the Han  
443 Chinese population. *Prog Neuropsychopharmacol Biol Psychiatry* 36: 17-21. doi: 10.1016/j.pnpbp.2011.09.011.
- 444 Chen YJ, Zhang M, Yin DM, Wen L, Ting A, Wang P, Lu YS, Zhu XH, Li SJ, Wu CY, et al. 2010. ErbB4 in parvalbumin-  
445 positive interneurons is critical for neuregulin 1 regulation of long-term potentiation. *Proc Natl Acad Sci U S A* 107:  
446 21818-21823. doi: 10.1073/pnas.1010669107.
- 447 Chevalier J, Derkinderen P, Gomes P, Thinard R, Naveilhan P, Vanden Berghe P, and Neunlist M. 2008. Activity-  
448 dependent regulation of tyrosine hydroxylase expression in the enteric nervous system. *J Physiol* 586: 1963-1975. doi:  
449 10.1113/jphysiol.2007.149815.
- 450 Chong VZ, Thompson M, Beltaifa S, Webster MJ, Law AJ, and Weickert CS. 2008. Elevated neuregulin-1 and ErbB4  
451 protein in the prefrontal cortex of schizophrenic patients. *Schizophr Res* 100: 270-280. doi:  
452 10.1016/j.schres.2007.12.474.
- 453 Cosgrove VE, Kelsoe JR, and Suppes T. 2015. Toward a valid animal model of bipolar disorder: how the research domain  
454 criteria help bridge the clinical-basic science divide. *Biological Psychiatry* 79: 62-70. doi:  
455 10.1016/j.biopsych.2015.09.002.
- 456 Craddock N, and Sklar P. 2009. Genetics of bipolar disorder: successful start to a long journey. *Trends Genet* 25: 99-105.  
457 doi: 10.1016/j.tig.2008.12.002.
- 458 Del Pino I, Garcia-Frigola C, Dehorter N, Brotons-Mas JR, Alvarez-Salvado E, Martinez de Lagran M, Ciceri G, Gabaldon  
459 MV, Moratal D, Dierssen M, et al. 2013. Erbb4 deletion from fast-spiking interneurons causes schizophrenia-like  
460 phenotypes. *Neuron* 79: 1152-1168. doi: 10.1016/j.neuron.2013.07.010.
- 461 Devoto P, Flore G, Saba P, Fa M, and Gessa GL. 2005. Stimulation of the locus coeruleus elicits noradrenaline and  
462 dopamine release in the medial prefrontal and parietal cortex. *J Neurochem* 92: 368-374. doi: 10.1111/j.1471-  
463 4159.2004.02866.x.

- 464 Dickinson SL, Gadie B, and Tulloch IF. 1988. Alpha 1- and alpha 2-adrenoreceptor antagonists differentially influence  
465 locomotor and stereotyped behaviour induced by d-amphetamine and apomorphine in the rat. *Psychopharmacology*  
466 (*Berl*) 96: 521-527. doi.
- 467 Fisahn A, Neddens J, Yan L, and Buonanno A. 2009. Neuregulin-1 modulates hippocampal gamma oscillations:  
468 implications for schizophrenia. *Cereb Cortex* 19: 612-618. doi: 10.1093/cercor/bhn107.
- 469 Gary Aston-Jones aJDC. 2005. An Integrative Theory of Locus Coeruleus-Norepinephrine Function Adaptive Gain and  
470 Optimal Performance.pdf. *Annu Rev Neurosci* 28: 403. doi: 10.1146/.
- 471 Gelman DM, Noain D, Avale ME, Otero V, Low MJ, and Rubinstein M. 2003. Transgenic mice engineered to target  
472 Cre/loxP-mediated DNA recombination into catecholaminergic neurons. *Genesis* 36: 196-202. doi: 10.1002/gene.10217.
- 473 Gerecke. 2001. ErbB Transmembrane Tyrosine Kinase.pdf. doi.
- 474 Goes FS, Rongione M, Chen YC, Karchin R, Elhaik E, Bipolar Genome S, and Potash JB. 2011. Exonic DNA sequencing of  
475 ERBB4 in bipolar disorder. *PLoS One* 6: e20242. doi: 10.1371/journal.pone.0020242.
- 476 Gong S, Doughty M, Harbaugh CR, Cummins A, Hatten ME, Heintz N, and Gerfen CR. 2007. Targeting Cre recombinase  
477 to specific neuron populations with bacterial artificial chromosome constructs. *J Neurosci* 27: 9817-9823. doi:  
478 10.1523/JNEUROSCI.2707-07.2007.
- 479 Gouvea ES, Ota VK, Noto C, Santoro ML, Spindola LM, Moretti PN, Carvalho CM, Xavier G, Rios AC, Sato JR, *et al.* 2016.  
480 Gene expression alterations related to mania and psychosis in peripheral blood of patients with a first episode of  
481 psychosis. *Transl Psychiatry* 6: e908. doi: 10.1038/tp.2016.159.
- 482 Guiard BP, El Mansari M, Merali Z, and Blier P. 2008. Functional interactions between dopamine, serotonin and  
483 norepinephrine neurons: an in-vivo electrophysiological study in rats with monoaminergic lesions. *Int J*  
484 *Neuropsychopharmacol* 11: 625-639. doi: 10.1017/s1461145707008383.
- 485 Hahn CG, Wang HY, Cho DS, Talbot K, Gur RE, Berrettini WH, Bakshi K, Kamins J, Borgmann-Winter KE, Siegel SJ, *et al.*  
486 2006. Altered neuregulin 1-erbB4 signaling contributes to NMDA receptor hypofunction in schizophrenia. *Nat Med* 12:  
487 824-828. doi: 10.1038/nm1418.
- 488 Han K, Holder JL, Jr., Schaaf CP, Lu H, Chen H, Kang H, Tang J, Wu Z, Hao S, Cheung SW, *et al.* 2013. SHANK3  
489 overexpression causes manic-like behaviour with unique pharmacogenetic properties. *Nature* 503: 72-77. doi:  
490 10.1038/nature12630.
- 491 Harrison PJ, Geddes JR, and Tunbridge EM. 2017. The Emerging Neurobiology of Bipolar Disorder. *Trends Neurosci.* doi:  
492 10.1016/j.tins.2017.10.006.
- 493 Holden C. 2008. Poles apart. *Science* 321: 193-195. doi: 10.1126/science.321.5886.193.
- 494 Jedema HP, and Grace AA. 2004. Corticotropin-releasing hormone directly activates noradrenergic neurons of the locus  
495 ceruleus recorded in vitro. *J Neurosci* 24: 9703-9713. doi: 10.1523/JNEUROSCI.2830-04.2004.
- 496 Jodo E, and Aston-Jones G. 1997. Activation of locus coeruleus by prefrontal cortex is mediated by excitatory amino  
497 acid inputs. *Brain Res* 768: 327-332. doi: 10.1016/S0006-8993(97)00703-8.
- 498 Jope RS. 1999. Anti-bipolar therapy: mechanism of action of lithium. *Mol Psychiatry* 4: 117-128. doi.
- 499 Kato T. 2008. Molecular neurobiology of bipolar disorder a disease of 'mood-stabilizing neurons?'.pdf. *Trends in*  
500 *Neurosciences* 31: 495. doi: 10.1016/j.tins.2008.07.007.
- 501 Kirshenbaum GS, Clapcote SJ, Duffy S, Burgess CR, Petersen J, Jarowek KJ, Yucel YH, Cortez MA, Snead OC, 3rd, Vilsen B,  
502 *et al.* 2011. Mania-like behavior induced by genetic dysfunction of the neuron-specific Na<sup>+</sup>,K<sup>+</sup>-ATPase alpha3 sodium  
503 pump. *Proc Natl Acad Sci U S A* 108: 18144-18149. doi: 10.1073/pnas.1108416108.
- 504 Kurita M. 2016. Noradrenaline plays a critical role in the switch to a manic episode and treatment of a depressive  
505 episode. *Neuropsychiatr Dis Treat* 12: 2373-2380. doi: 10.2147/NDT.S109835.
- 506 Lammel S, Steinberg EE, Foldy C, Wall NR, Beier K, Luo L, and Malenka RC. 2015. Diversity of transgenic mouse models  
507 for selective targeting of midbrain dopamine neurons. *Neuron* 85: 429-438. doi: 10.1016/j.neuron.2014.12.036.
- 508 Langer SZ. 1980. Presynaptic regulation of the release of catecholamines. *Pharmacol Rev* 32: 337-362. doi.
- 509 Lew JY, Garcia-Espana A, Lee KY, Carr KD, Goldstein M, Haycock JW, and Meller E. 1999. Increased site-specific  
510 phosphorylation of tyrosine hydroxylase accompanies stimulation of enzymatic activity induced by cessation of  
511 dopamine neuronal activity. *Mol Pharmacol* 55: 202-209. doi: 10.1124/mol.55.2.202.
- 512 Li KX, Lu YM, Xu ZH, Zhang J, Zhu JM, Zhang JM, Cao SX, Chen XJ, Chen Z, Luo JH, *et al.* 2012. Neuregulin 1 regulates  
513 excitability of fast-spiking neurons through Kv1.1 and acts in epilepsy. *Nat Neurosci* 15: 267-273. doi: 10.1038/nn.3006.
- 514 Lindeberg J, Usoskin D, Bengtsson H, Gustafsson A, Kylberg A, Soderstrom S, and Ebendal T. 2004. Transgenic  
515 expression of Cre recombinase from the tyrosine hydroxylase locus. *Genesis* 40: 67-73. doi: 10.1002/gene.20065.
- 516 Maas JW, Dekirmenjian H, and Fawcett J. 1971. Catecholamine metabolism, depression and stress. *Nature* 230: 330-  
517 331. doi.
- 518 Madisen L, Zwingman TA, Sunkin SM, Oh SW, Zariwala HA, Gu H, Ng LL, Palmiter RD, Hawrylycz MJ, Jones AR, *et al.*  
519 2010. A robust and high-throughput Cre reporting and characterization system for the whole mouse brain. *Nature*  
520 *neuroscience* 13: 133-140. doi: 10.1038/nn.2467.

- 521 Manji HK, Quiroz JA, Payne JL, Singh J, Lopes BP, Viegas JS, and Zarate CA. 2003. The underlying neurobiology of bipolar  
522 disorder. *World Psychiatry* 2: 136-146. doi.
- 523 Mather M, and Harley CW. 2016. The Locus Coeruleus: Essential for Maintaining Cognitive Function and the Aging  
524 Brain. *Trends Cogn Sci* 20: 214-226. doi: 10.1016/j.tics.2016.01.001.
- 525 Mei L, and Nave KA. 2014. Neuregulin-ERBB signaling in the nervous system and neuropsychiatric diseases. *Neuron* 83:  
526 27-49. doi: 10.1016/j.neuron.2014.06.007.
- 527 Mei L, and Xiong WC. 2008. Neuregulin 1 in neural development, synaptic plasticity and schizophrenia. *Nat Rev*  
528 *Neurosci* 9: 437-452. doi: 10.1038/nrn2392.
- 529 Moret C, and Briley M. 2011. The importance of norepinephrine in depression. *Neuropsychiatr Dis Treat* 7: 9-13. doi:  
530 10.2147/NDT.S19619.
- 531 Neophytou SI, Aspley S, Butler S, Beckett S, and Marsden CA. 2001. Effects of lesioning noradrenergic neurones in the  
532 locus coeruleus on conditioned and unconditioned aversive behaviour in the rat. *Prog Neuropsychopharmacol Biol*  
533 *Psychiatry* 25: 1307-1321. doi.
- 534 Nestler EJ, and Hyman SE. 2010. Animal models of neuropsychiatric disorders. *Nat Neurosci* 13: 1161-1169. doi:  
535 10.1038/nn.2647.
- 536 Pamphlett R. 2014. Uptake of environmental toxicants by the locus ceruleus: a potential trigger for neurodegenerative,  
537 demyelinating and psychiatric disorders. *Med Hypotheses* 82: 97-104. doi: 10.1016/j.mehy.2013.11.016.
- 538 Pitcher GM, Kalia LV, Ng D, Goodfellow NM, Yee KT, Lambe EK, and Salter MW. 2011. Schizophrenia susceptibility  
539 pathway neuregulin 1-ErbB4 suppresses Src upregulation of NMDA receptors. *Nat Med* 17: 470-478. doi:  
540 10.1038/nm.2315.
- 541 Post RM, Gordon EK, Goodwin FK, and Bunney WE, Jr. 1973. Central norepinephrine metabolism in affective illness:  
542 MHPG in the cerebrospinal fluid. *Science* 179: 1002-1003. doi.
- 543 Post RM, Lake CR, Jimerson DC, Bunney WE, Wood JH, Ziegler MG, and Goodwin FK. 1978. Cerebrospinal fluid  
544 norepinephrine in affective illness. *Am J Psychiatry* 135: 907-912. doi.
- 545 Pozzi L, Invernizzi R, Cervo L, Vallebuona F, and Samanin R. 1994. Evidence that extracellular concentrations of  
546 dopamine are regulated by noradrenergic neurons in the frontal cortex of rats. *J Neurochem* 63: 195-200. doi:  
547 10.1046/j.1471-4159.1994.63010195.x.
- 548 Prickaerts J, Moechars D, Cryns K, Lenaerts I, van Craenendonck H, Goris I, Daneels G, Bouwknecht JA, and Steckler T.  
549 2006. Transgenic mice overexpressing glycogen synthase kinase 3beta: a putative model of hyperactivity and mania. *J*  
550 *Neurosci* 26: 9022-9029. doi: 10.1523/JNEUROSCI.5216-05.2006.
- 551 Ross JA, McGonigle P, and Van Bockstaele EJ. 2015. Locus Coeruleus, norepinephrine and Abeta peptides in Alzheimer's  
552 disease. *Neurobiol Stress* 2: 73-84. doi: 10.1016/j.ynstr.2015.09.002.
- 553 Roybal K, Theobald D, Graham A, DiNieri JA, Russo SJ, Krishnan V, Chakravarty S, Peevey J, Oehrlein N, Birnbaum S, et  
554 al. 2007. Mania-like behavior induced by disruption of CLOCK. *Proc Natl Acad Sci U S A* 104: 6406-6411. doi:  
555 10.1073/pnas.0609625104.
- 556 Salvatore G, Quiroz JA, Machado-Vieira R, Henter ID, Manji HK, and Zarate CA. 2010. The Neurobiology of the Switch  
557 Process in Bipolar Disorder: a Review. *The Journal of clinical psychiatry* 71: 1488-1501. doi: 10.4088/JCP.09r05259gre.
- 558 Sara SJ. 2009. The locus coeruleus and noradrenergic modulation of cognition. *Nat Rev Neurosci* 10: 211-223. doi:  
559 10.1038/nrn2573.
- 560 Saul MC, Gessay GM, and Gammie SC. 2012. A new mouse model for mania shares genetic correlates with human  
561 bipolar disorder. *PLoS One* 7: e38128. doi: 10.1371/journal.pone.0038128.
- 562 Savitt JM, Jang SS, Mu W, Dawson VL, and Dawson TM. 2005. Bcl-x is required for proper development of the mouse  
563 substantia nigra. *J Neurosci* 25: 6721-6728. doi: 10.1523/JNEUROSCI.0760-05.2005.
- 564 Schloesser RJ, Martinowich K, and Manji HK. 2012. Mood-stabilizing drugs: mechanisms of action. *Trends Neurosci* 35:  
565 36-46. doi: 10.1016/j.tins.2011.11.009.
- 566 Shaltiel G, Maeng S, Malkesman O, Pearson B, Schloesser RJ, Tragon T, Rogawski M, Gasior M, Luckenbaugh D, Chen G,  
567 and Manji HK. 2008. Evidence for the involvement of the kainate receptor subunit GluR6 (GRIK2) in mediating  
568 behavioral displays related to behavioral symptoms of mania. *Mol Psychiatry* 13: 858-872. doi: 10.1038/mp.2008.20.
- 569 Shamir A, Kwon OB, Karavanova I, Vullhorst D, Leiva-Salcedo E, Janssen MJ, and Buonanno A. 2012. The importance of  
570 the NRG-1/ErbB4 pathway for synaptic plasticity and behaviors associated with psychiatric disorders. *J Neurosci* 32:  
571 2988-2997. doi: 10.1523/JNEUROSCI.1899-11.2012.
- 572 Skirzewski M, Karavanova I, Shamir A, Erben L, Garcia-Olivares J, Shin JH, Vullhorst D, Alvarez VA, Amara SG, and  
573 Buonanno A. 2017. ErbB4 signaling in dopaminergic axonal projections increases extracellular dopamine levels and  
574 regulates spatial/working memory behaviors. *Mol Psychiatry*. doi: 10.1038/mp.2017.132.
- 575 Somogyi J, and Llewellyn-Smith IJ. 2001. Patterns of colocalization of GABA, glutamate and glycine immunoreactivities  
576 in terminals that synapse on dendrites of noradrenergic neurons in rat locus coeruleus. *Eur J Neurosci* 14: 219-228. doi:  
577 10.1046/j.0953-816x.2001.01638.x.

- 578 Starke K. 2001. Presynaptic autoreceptors in the third decade: focus on alpha2-adrenoceptors. *J Neurochem* 78: 685-  
579 693. doi: 10.1046/j.1471-4159.2001.00484.x.
- 580 Tan GH, Liu YY, Hu XL, Yin DM, Mei L, and Xiong ZQ. 2012. Neuregulin 1 represses limbic epileptogenesis through ErbB4  
581 in parvalbumin-expressing interneurons. *Nat Neurosci* 15: 258-266. doi: 10.1038/nn.3005.
- 582 Wiste AK, Arango V, Ellis SP, Mann JJ, and Underwood MD. 2008. Norepinephrine and serotonin imbalance in the locus  
583 coeruleus in bipolar disorder. *Bipolar Disord* 10: 349-359. doi: 10.1111/j.1399-5618.2007.00528.x.
- 584 Yamamoto BK, and Novotney S. 1998. Regulation of extracellular dopamine by the norepinephrine transporter. *J*  
585 *Neurochem* 71: 274-280. doi: 10.1046/j.1471-4159.1998.71010274.x.
- 586 Zigmond RE, Schwarzschild MA, and Rittenhouse AR. 1989. Acute regulation of tyrosine hydroxylase by nerve activity  
587 and by neurotransmitters via phosphorylation. *Annu Rev Neurosci* 12: 415-461. doi:  
588 10.1146/annurev.ne.12.030189.002215.

589

590 **Figure legends**

591 **Figure 1.** ErbB4 is primarily deleted in NE neurons of the LC in *TH-Cre;Erbb4<sup>loxP/loxP</sup>* mice. **A**, Representative micrographs of  
592 Cre/Tomato distribution (red) in the locus coeruleus (LC), ventral tegmental area (VTA), and substantia nigra pars compacta (SNc).  
593 Slices were obtained from Ai9;*TH-Cre* mice and stained with antibody to TH (green), a marker of NE and dopaminergic neurons.  
594 Scale bar, 50  $\mu$ m. **B**, Colocalization of TH and Cre/Tomato. Three mice were studied, with three slices chosen for each mouse. **C**,  
595 Genotyping of *TH-Cre;Erbb4<sup>loxP/loxP</sup>* mice. The *Erbb4* primers generated a 363-base pair (bp) product for the wild-type allele or a 500-  
596 bp product for the loxP-flanked allele. The *TH-Cre* primers generated a band between 300 and 400 bp. **D, E**, Quantification of the fold  
597 change in ErbB4 protein expression relative to control mice. Unpaired two-tailed Student's t-test. Data are expressed as means  $\pm$  s.e.m.  
598 \*\*  $p < 0.01$ . **F**, Specific deletion of ErbB4 in NE neurons of the LC. Sections from *TH-Cre* mice and *TH-Cre;Erbb4<sup>loxP/loxP</sup>* mice were  
599 stained with ErbB4-specific antibody and TH-specific antibody. Sections were also stained with DAPI to indicate nuclei. Scale bar, 10  
600  $\mu$ m.

601 **Figure 2.** Increased spontaneous firing of LC-NE neurons, extracellular norepinephrine, and intracellular TH phosphorylation in *TH-*  
602 *Cre;Erbb4<sup>loxP/loxP</sup>* mice. **A, B**, Representative firing of LC-NE neurons from control (black) and *TH-Cre;Erbb4<sup>loxP/loxP</sup>* mice (red). **C**,  
603 Spontaneous firing frequency of LC-NE neurons increased in *TH-Cre;Erbb4<sup>loxP/loxP</sup>* mice.  $n = 11$  from three mice (control);  $n = 13$   
604 from three mice (*TH-Cre;Erbb4<sup>loxP/loxP</sup>*). **D**, Interspike intervals were calculated over 2 min of firing from each neuron. Interspike  
605 intervals were decreased in *TH-Cre;Erbb4<sup>loxP/loxP</sup>* mice compared with control mice.  $n = 11$  from three mice (control);  $n = 13$  from  
606 three mice (*TH-Cre;Erbb4<sup>loxP/loxP</sup>*). Two-sample Kolmogorov-Smirnov test and data in (D) are presented in a cumulative frequency  
607 plot. \*\*\*\*  $p < 0.0001$ . **E, F**, Protein levels of TH-Ser40 were increased in the LC of *TH-Cre;Erbb4<sup>loxP/loxP</sup>* mice. NET, norepinephrine  
608 reuptake transporter; DBH, dopamine beta-hydroxylase; S-COMT, soluble catechol-o-methyltransferase; MB-COMT, membrane-  
609 binding form of COMT. **G, H**, No significant change was detected in the dopaminergic neurons clustered in the midbrain (VTA and  
610 SNc). **I, J**, *In vivo* microdialysis and HPLC data suggested that norepinephrine and dopamine levels were significantly increased in  
611 *TH-Cre;Erbb4<sup>loxP/loxP</sup>* mice. Standard curves are presented in Figures 2-figure supplement 2.  $n = 6$  mice (control);  $n = 6$  mice (*TH-*  
612 *Cre;Erbb4<sup>loxP/loxP</sup>*). Unpaired two-tailed Student's t-test. Data are expressed as means  $\pm$  s.e.m. \*  $p < 0.05$ .

613 **Figure 3.** NMDA receptor mediates hyperexcitability of LC-NE neurons in *TH-Cre;Erbb4<sup>loxP/loxP</sup>* mice. **A, B**, Protein levels of NMDA  
614 receptor subunit NR2B were increased in the LC of *TH-Cre;Erbb4<sup>loxP/loxP</sup>* mice. Unpaired two-tailed Student's t-test. Data are  
615 expressed as means  $\pm$  s.e.m. \*  $p < 0.05$ . **C**, Representative firing of LC-NE neurons from control and *TH-Cre;Erbb4<sup>loxP/loxP</sup>* mice  
616 untreated or treated with APV (50  $\mu$ M), a NMDA receptor antagonist. **D**, Spontaneous firing frequency of LC-NE neurons was rescued  
617 by APV (50  $\mu$ M) in *TH-Cre;Erbb4<sup>loxP/loxP</sup>* mice.  $n = 13$  from three mice (*TH-Cre;Erbb4<sup>loxP/loxP</sup>*);  $n = 20$  from three mice (*TH-*  
618 *Cre;Erbb4<sup>loxP/loxP</sup>+APV*). Two-way ANOVA. Data are expressed as means  $\pm$  s.e.m. \*  $p < 0.05$ . **E**, Interspike intervals were  
619 significantly rescued by APV (50  $\mu$ M) in *TH-Cre;Erbb4<sup>loxP/loxP</sup>* mice.  $n = 13$  from three mice (*TH-Cre;Erbb4<sup>loxP/loxP</sup>*);  $n = 20$  from three  
620 mice (*TH-Cre;Erbb4<sup>loxP/loxP</sup>+APV*). Two-sample Kolmogorov-Smirnov test and data in (E) are presented in a cumulative frequency  
621 plot. \*\*\*  $p < 0.001$ .

622 **Figure 4.** *TH-Cre;Erbb4<sup>loxP/loxP</sup>* mice show mania-like behaviors. **A**, Representative trajectories of control and *TH-Cre;Erbb4<sup>loxP/loxP</sup>*  
623 mice. We defined high speed (red line) as  $> 10$  cm/s, immobility as  $< 2$  cm/s, and low speed (green line) as 2–10 cm/s. **B, C**,

624 Locomotor activity (B) and speed (C) of control and *TH-Cre;ErbB4<sup>loxp/loxp</sup>* mice in open field tests. D, E, Distance (D) and duration (E)  
625 traveled at high speed (HS). F, Immobility time during open field tests decreased in *TH-Cre;ErbB4<sup>loxp/loxp</sup>* mice. G, Examples of the  
626 performance of control and *TH-Cre;ErbB4<sup>loxp/loxp</sup>* mice in the EPM test. C, closed arm; O, open arm. H, I, Performance of control and  
627 *TH-Cre;ErbB4<sup>loxp/loxp</sup>* mice in the EPM test. J, K, Immobility time (J) and latency to first surrender (K) in the forced swim test. L,  
628 Sucrose preference of control and *TH-Cre;ErbB4<sup>loxp/loxp</sup>* mice. Water (w). Sucrose (s). Unpaired two-tailed Student's t-test. Data are  
629 expressed as means  $\pm$  s.e.m. \*  $p < 0.05$ , \*\*  $p < 0.01$ , \*\*\*  $p < 0.001$ , \*\*\*\*  $p < 0.0001$ . n.s., not significant.

630 **Figure 5.** Specific ablation of ErbB4 in the LC is sufficient to cause mania-like behaviors. A, Illustration of bilateral viral injection of  
631 AAV-Cre-GFP in the mouse LC. LC sections were examined for Cre/GFP (green) 5 weeks after stereotaxic microinjection of AAV-  
632 Cre-GFP into the LC of *ErbB4<sup>loxp/loxp</sup>* mice; antibody staining for TH is shown in red. Scale bars, 50  $\mu$ m. Cartogram is presented in  
633 Figure S5. B, ErbB4 expression was significantly decreased in *ErbB4<sup>loxp/loxp</sup>* mice after AAV-Cre-GFP injection. C, D, Locomotor  
634 activity (C) and speed (D) of mice injected with AAV-GFP or AAV-Cre-GFP in the open field test. E-G, Distance (E) and duration  
635 (F) traveled at HS and immobility time (G) of mice in the open field test after viral injection. H, I, Percentage of time (H) and entries  
636 (I) into the open arms by mice injected with AAV-GFP or AAV-Cre-GFP in the EPM test. J, K, Immobility time (J) and latency to  
637 first surrender (K) in the forced swim test with AAV-GFP or AAV-Cre-GFP injection. L, Sucrose preference of mice injected with  
638 AAV-GFP or AAV-Cre-GFP. Unpaired two-tailed Student's t-test. Data are expressed as means  $\pm$  s.e.m. \*  $p < 0.05$ , \*\*  $p < 0.01$ , \*\*\*\*  
639  $p < 0.0001$ .

640 **Figure 6.** Lithium rescued the behavioral, molecular, and electrophysiological phenotypes of *TH-Cre;ErbB4<sup>loxp/loxp</sup>* mice. A, B  
641 Locomotor activity (A) and speed (B) in the open field test. C-E, Distance (C) and duration (D) traveled at HS and immobility time  
642 (E) after lithium treatment. F, G Percentage of time (F) and entries (G) into open arms by *TH-Cre;ErbB4<sup>loxp/loxp</sup>* mice with and without  
643 lithium in the EPM test. H, I Immobility time (H) and latency to first surrender (I) in forced swim test. J, Sucrose preference of *TH-*  
644 *Cre;ErbB4<sup>loxp/loxp</sup>* mice treated with lithium. K, Western blots of LC samples from *TH-Cre;ErbB4<sup>loxp/loxp</sup>* mice with and without lithium  
645 treatment. L, Protein level of TH-Ser40 in the LC after lithium treatment. Protein levels of TH, s-COMT, and MB-COMT were not  
646 significantly changed in the LC after lithium treatment. TH, tyrosine hydroxylase; S-COMT, soluble catechol-o-methyltransferase;  
647 MB-COMT, membrane-binding form of COMT. M, Spontaneous firing of LC-NE neurons after lithium treatment.  $n = 13$  from three  
648 mice (*TH-Cre;ErbB4<sup>loxp/loxp</sup>*);  $n = 15$  from three mice (*TH-Cre;ErbB4<sup>loxp/loxp</sup>* + lithium). N, Interspike intervals after lithium treatment.  $n$   
649 = 13 from three mice (*TH-Cre;ErbB4<sup>loxp/loxp</sup>*);  $n = 15$  from three (*TH-Cre;ErbB4<sup>loxp/loxp</sup>* + lithium). Two-way ANOVA. Data are  
650 expressed as means  $\pm$  s.e.m. Two-sample Kolmogorov-Smirnov test and data in (N) are presented as a cumulative frequency plot. \*  $p$   
651  $< 0.05$ , \*\*  $p < 0.01$ , \*\*\*\*  $p < 0.0001$ . n.s., not significant.

652 **Figure 7.** Increase in both norepinephrine and dopamine contribute to mania-like behaviors. A, B, Locomotor activity (A) and speed  
653 (B) of *TH-Cre;ErbB4<sup>loxp/loxp</sup>* mice treated with saline (sal), prazosin, or SCH23390 in open field test. C, D, Distance (C) and duration  
654 (D) at HS in open field test. E, Immobility time in open field test. F, G, Time (F) and entries (G) in open arms in EPM test. H, I,  
655 Immobility time (H) and latency to first surrender (I) in forced swim tests. J, Sucrose preference of *TH-Cre;ErbB4<sup>loxp/loxp</sup>* mice after  
656 prazosin or SCH23390 treatment. One-way ANOVA and Tukey's multiple comparison test. Data are expressed as means  $\pm$  s.e.m. \*  $p <$   
657  $0.05$ , \*\*  $p < 0.01$ , \*\*\*  $p < 0.001$ , \*\*\*\*  $p < 0.0001$ . n.s., not significant.



659 **Supplementary figure legends**

660 **Figure 1-figure supplement 1.** Cre/GFP was primarily expressed in NE neurons of the LC in Ai3;*TH-Cre* mice. **A,** Representative  
661 micrographs of Cre/GFP distribution (green) in Ai3;*TH-Cre* mice. Locus coeruleus (LC), ventral tegmental area (VTA), and substantia  
662 nigra pars compacta (SNc) slices were obtained from Ai3;*TH-Cre* mice and stained with antibody to TH (red), a marker of NE and  
663 dopaminergic neurons. Scale bar, 50  $\mu$ m. **B,** Cartogram of Cre expression in TH-positive neurons in the LC, VTA, and SNc. Three  
664 mice were studied, with three slices for each mouse.

665 **Figure 1-figure supplement 2.** Erbb4 was primarily deleted in the LC of *TH-Cre;Erbb4<sup>loxp/loxp</sup>* mice. Shown are representative  
666 Western blots of the Erbb4 protein (180 kDa) in *TH-Cre;Erbb4<sup>loxp/loxp</sup>* mice. *Erbb4<sup>loxp/loxp</sup>* mice and *TH-Cre* mice were used as  
667 controls.

668 **Figure 1-figure supplement 3.** No obvious differences were detected in cell density or soma size of LC neurons between control and  
669 *TH-Cre;Erbb4<sup>loxp/loxp</sup>* mice. **A,** Representative micrographs of LC neurons in the dorsal and ventral parts of the LC in control and *TH-*  
670 *Cre;Erbb4<sup>loxp/loxp</sup>* mice. Coronal LC slices were obtained from control and *TH-Cre;Erbb4<sup>loxp/loxp</sup>* mice and were stained with antibody  
671 to TH (green), a marker of NE and dopaminergic neurons. Scale bar, 50  $\mu$ m. **B, C,** Cell density and soma size of LC neurons did not  
672 differ significantly between control and *TH-Cre;Erbb4<sup>loxp/loxp</sup>* mice. Unpaired two-tailed Student's t-test. Data are expressed as means  
673  $\pm$  s.e.m. n.s., not significant.

674 **Figure 2-figure supplement 1.** Representative Western blots of TH and COMT in the LC of control and *TH-Cre;Erbb4<sup>loxp/loxp</sup>* mice.  
675 Ser40 phosphorylation of tyrosine hydroxylase (TH-Ser40), tyrosine hydroxylase (TH), soluble catechol-o-methyltransferase (s-  
676 COMT), membrane-bound form of COMT (MB-COMT).

677 **Figure 2-figure supplement 2.** HPLC analysis of norepinephrine and dopamine. **A,** Representative graphs of main peaks in HPLC  
678 chromatograms. Norepinephrine; Dopamine. X-axis, retention time. **B,** Standard curves of norepinephrine (NE) and dopamine (DA).

679 **Figure 4-figure supplement 1.** There was no significant difference in body weight between control and *TH-Cre;Erbb4<sup>loxp/loxp</sup>* mice  
680 and no deficit of *TH-Cre;Erbb4<sup>loxp/loxp</sup>* mice in the prepulse inhibition experiment. **A,** No significant differences in body weight were  
681 detected between control and *TH-Cre;Erbb4<sup>loxp/loxp</sup>* mice. **B,** No prepulse inhibition deficit was observed in *TH-Cre;Erbb4<sup>loxp/loxp</sup>* mice.  
682 Unpaired two-tailed Student's t-test. Data are expressed as means  $\pm$  s.e.m. \* $p < 0.05$ . n.s., not significant.

683 **Figure 5-figure supplement 1.** Cartogram of the colocalization of Cre/GFP-positive (Cre/GFP+) and NE neurons (TH+) in the LC 5  
684 weeks after virus injection. Percentages of Cre/GFP+ neurons among NE neurons of the LC and of LC-NE neurons among Cre/GFP+  
685 neurons in *Erbb4<sup>loxp/loxp</sup>* mice after virus injection. Three mice were studied, with three slices for each mouse.

686 **Figure 1-Source data 1:** Statistical reporting of Figure 1

687 **Figure 2-Source data 1:** Statistical reporting of Figure 2

688 **Figure 3-Source data 1:** Statistical reporting of Figure 3

689 **Figure 4-Source data 1:** Statistical reporting of Figure 4

690 **Figure 5-Source data 1:** Statistical reporting of Figure 5

691 **Figure 6-Source data 1:** Statistical reporting of Figure 6

692 **Figure 7-Source data 1:** Statistical reporting of Figure 7



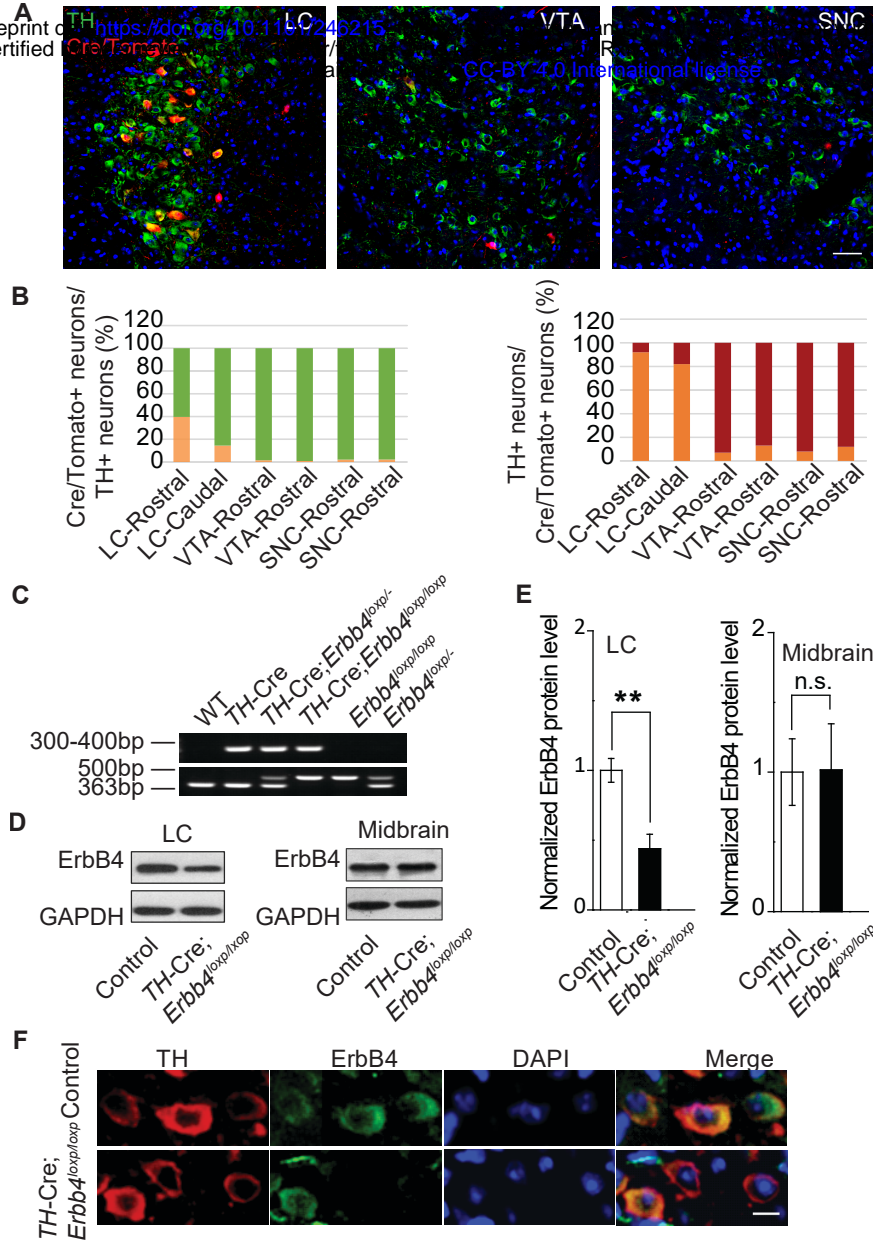

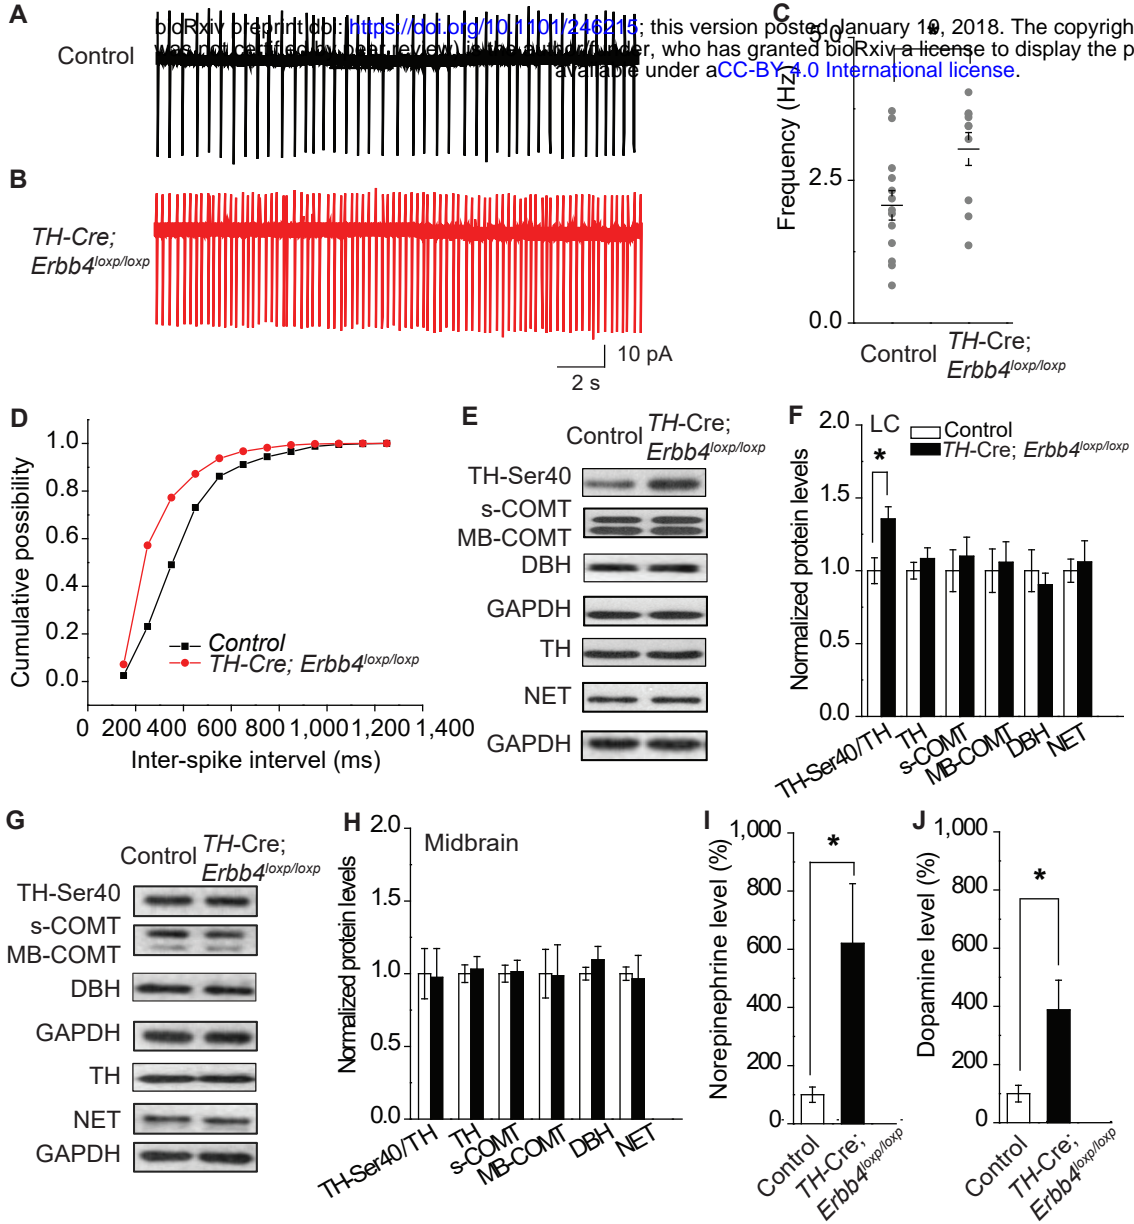

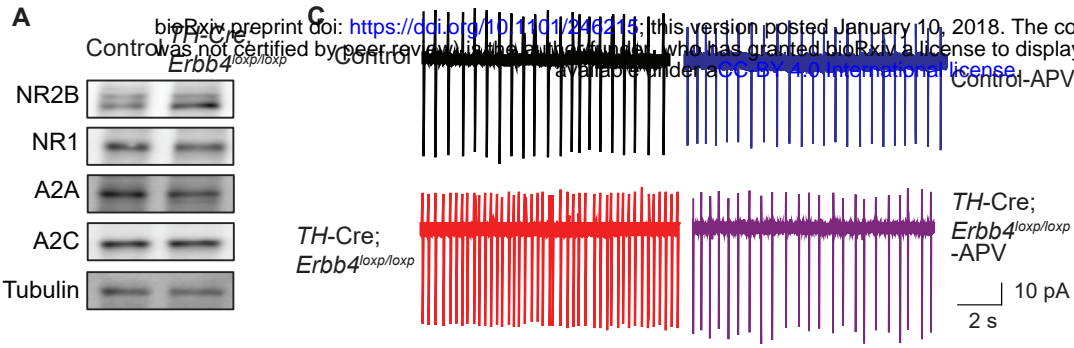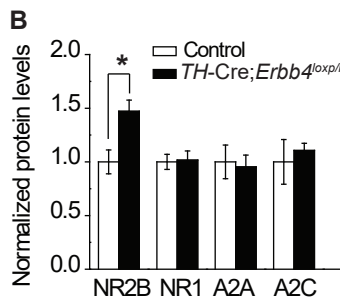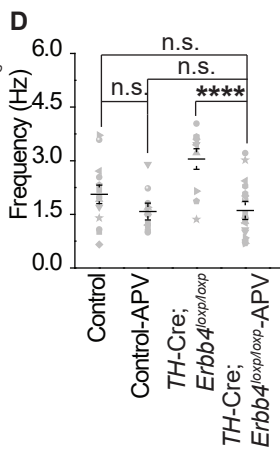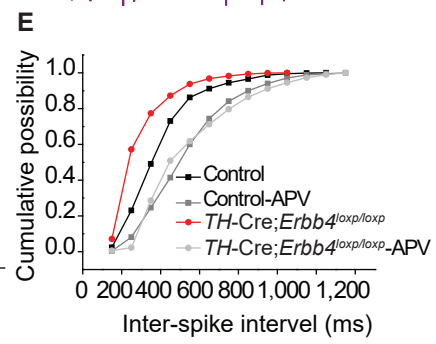

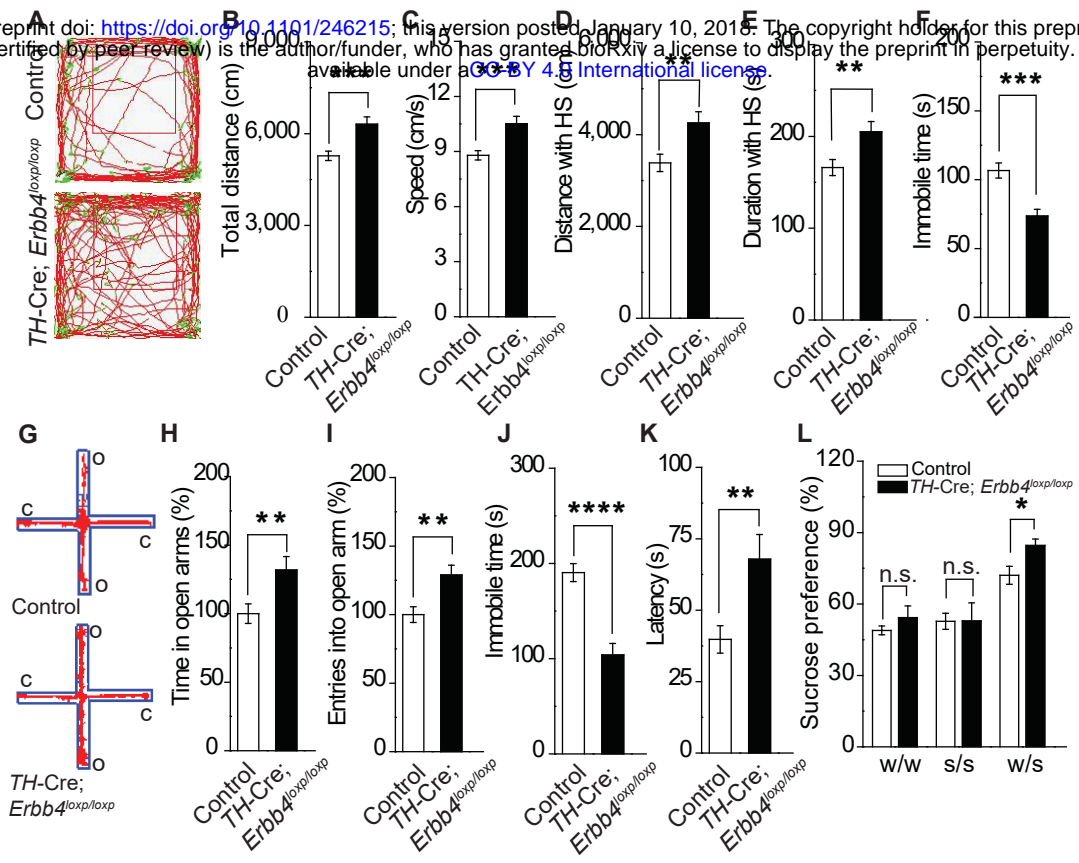

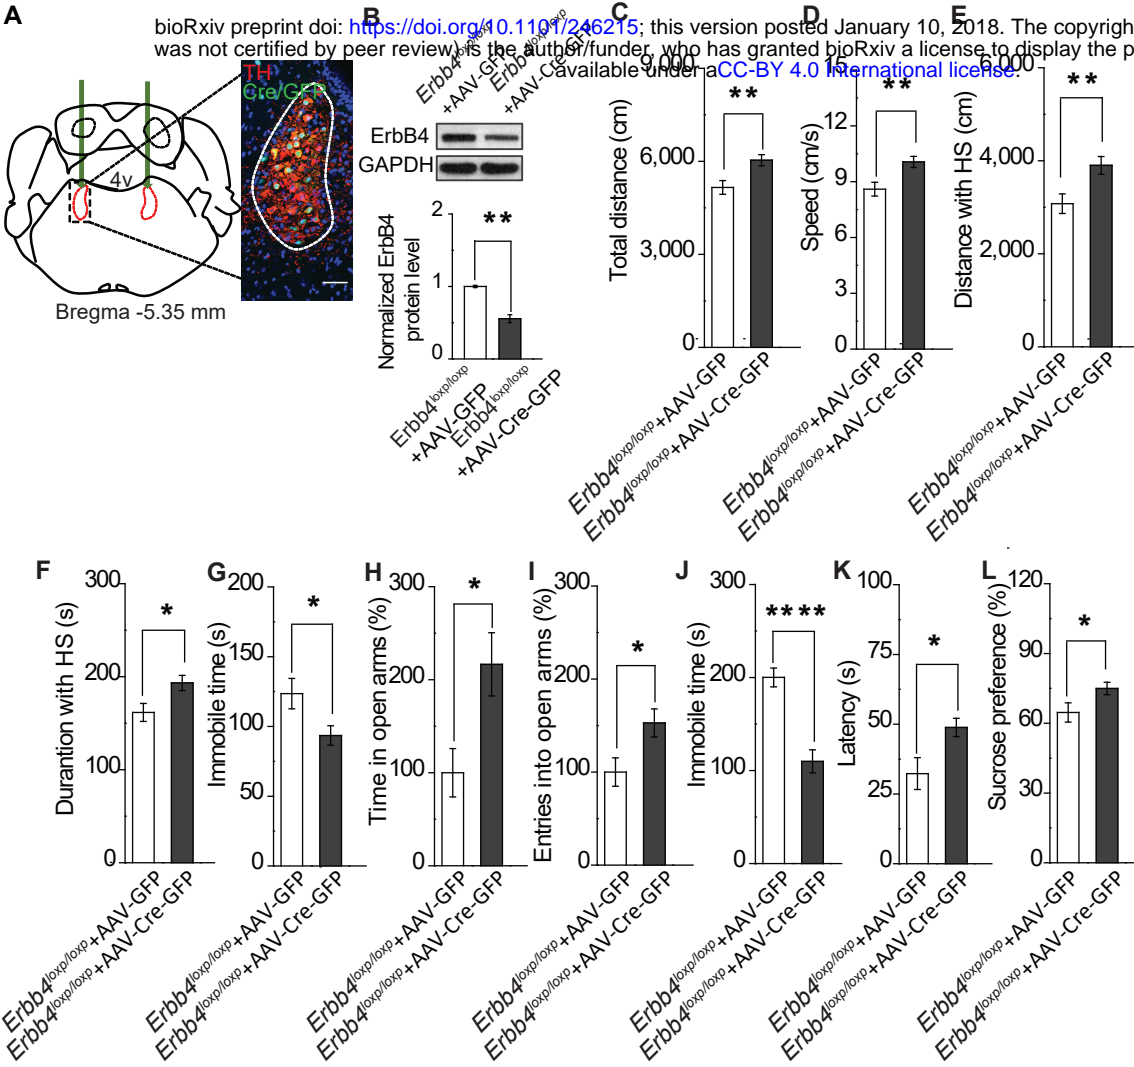

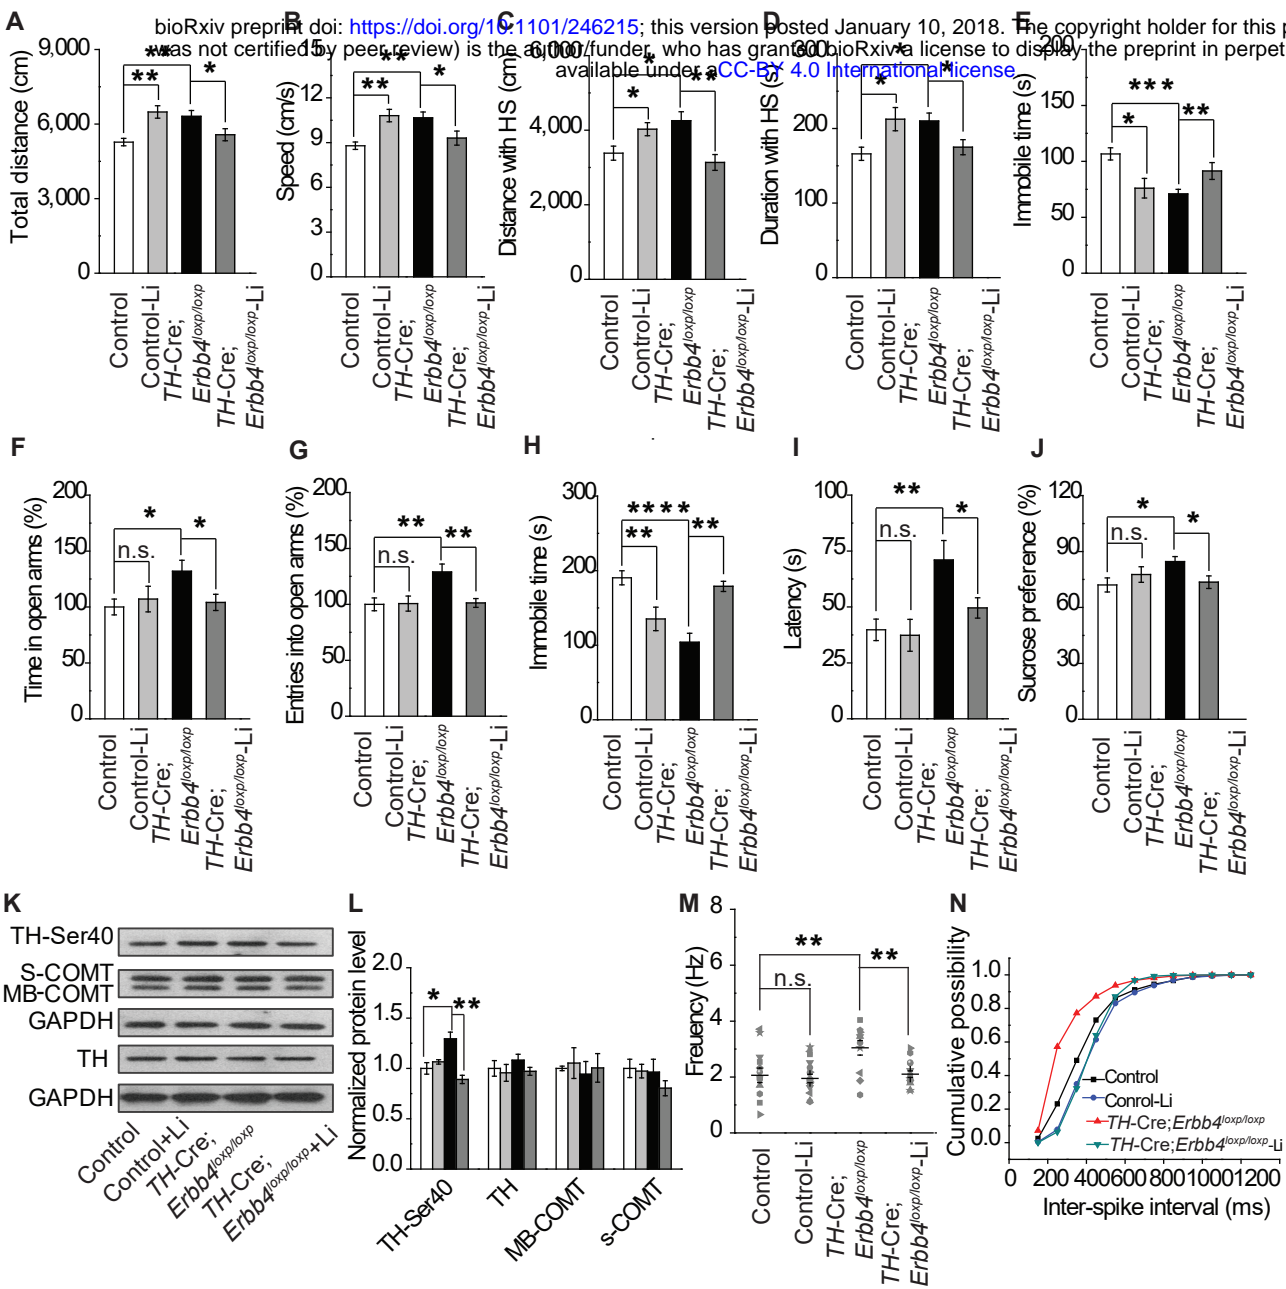

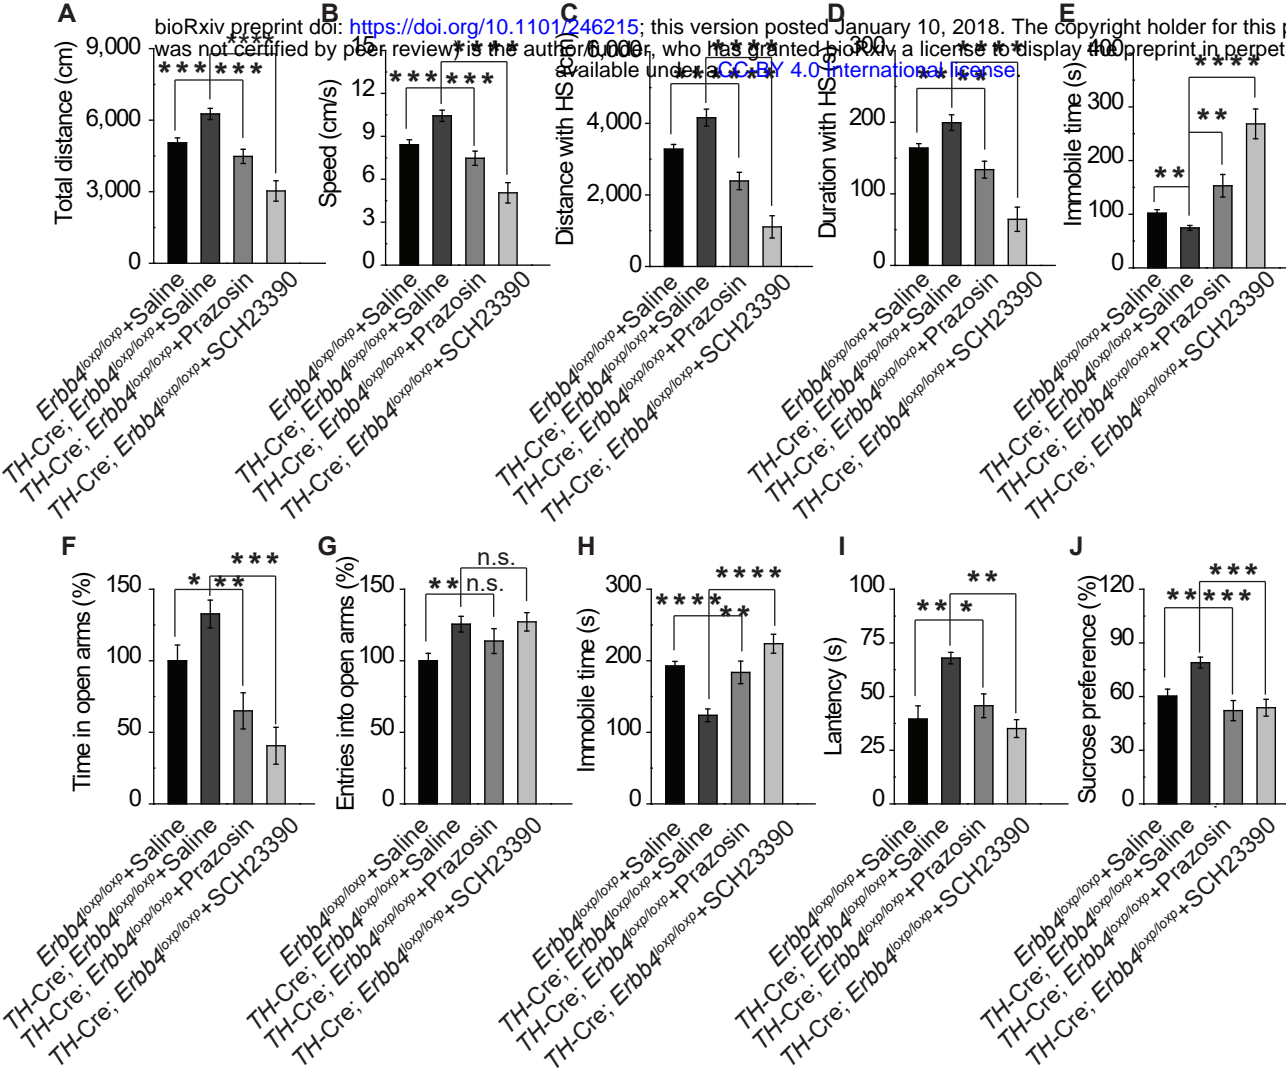

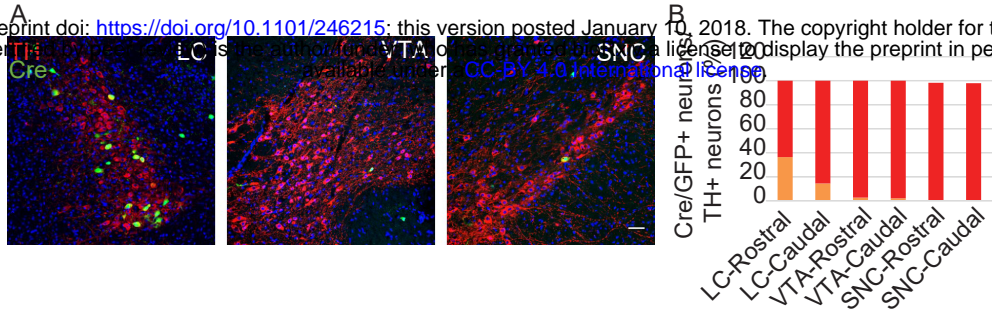





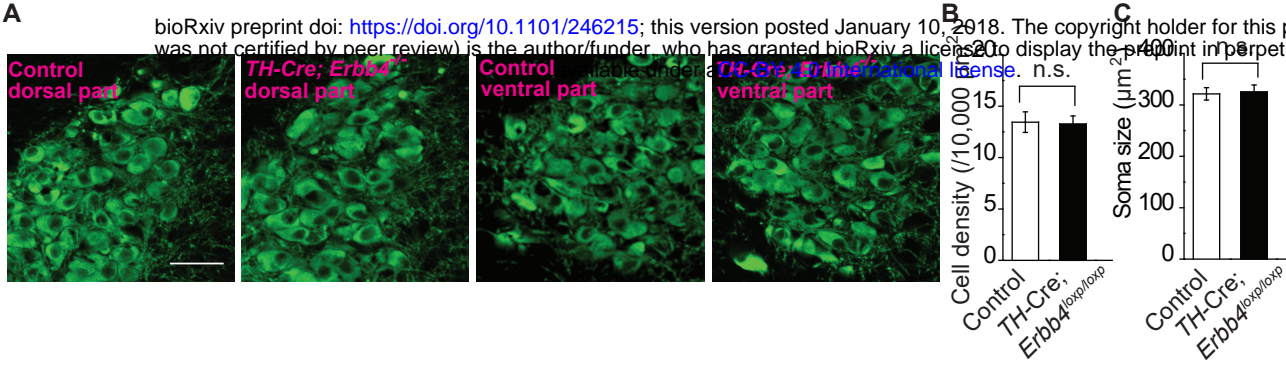

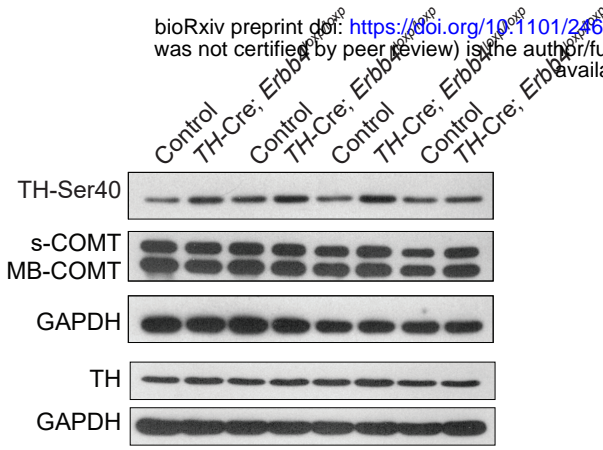

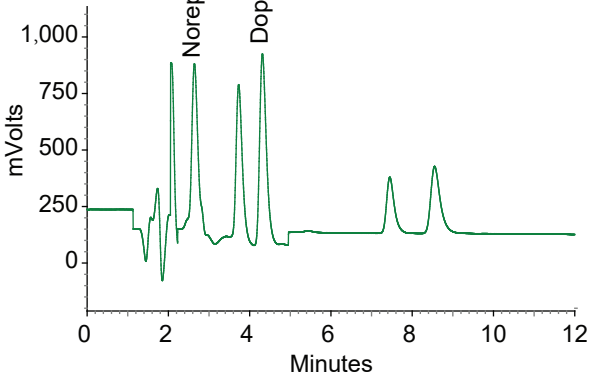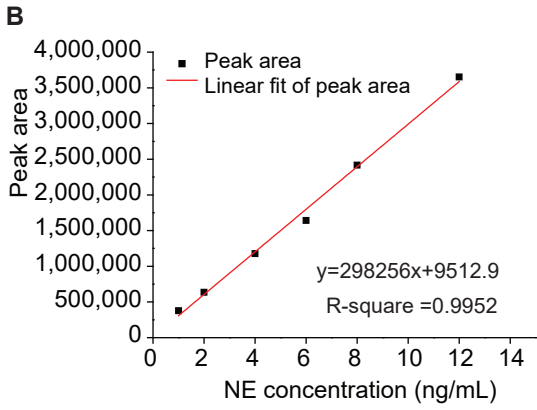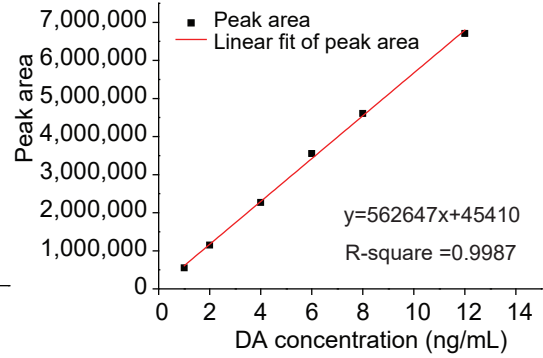

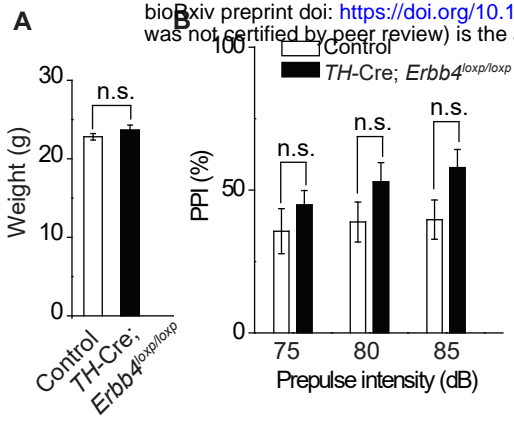

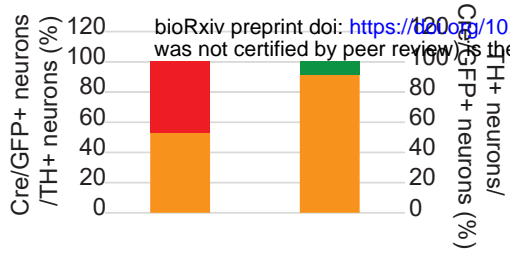

Source: https://www.biorxiv.org/content/10.1101/246215v1.full.pdf
